1 Microplastic consumption induces inflammatory signatures in the colon and prolongs a viral  
2 arthritis

3  
4 Daniel J. Rawle<sup>1</sup>, Troy Dumenil<sup>1</sup>, Bing Tang<sup>1</sup>, Cameron Bishop<sup>1</sup>, Kexin Yan<sup>1</sup>, Thuy T. Le<sup>1</sup>,  
5 Andreas Suhrbier<sup>1,2\*</sup>.

6  
7  
8 <sup>1</sup> Immunology Department, QIMR Berghofer Medical Research Institute, Brisbane, Queensland.  
9 4029, Australia.

10 <sup>2</sup> Australian Infectious Disease Research Centre, GVN Center of Excellence, Brisbane,  
11 Queensland 4029 and 4072, Australia.

12  
13  
14 \*Corresponding author and Lead Contact. Email: [Andreas.Suhrbier@qimrberghofer.edu.au](mailto:Andreas.Suhrbier@qimrberghofer.edu.au)

15  
16  
17  
18

19 **ABSTRACT**

20 Global microplastic (MP) contamination and the effects on the environment are well described.  
21 However, the potential for MP consumption to affect human health remains controversial. Mice  
22 consuming  $\approx 80$   $\mu\text{g}/\text{kg}/\text{day}$  of 1  $\mu\text{m}$  polystyrene MPs via their drinking water for a month showed  
23 no weight loss, nor were MPs detected in organs. The microbiome was also unchanged. MP  
24 consumption did lead to small transcriptional changes in the colon suggesting plasma membrane  
25 perturbations and mild inflammation. Mice were challenged with the arthritogenic chikungunya  
26 virus, with MP consumption leading to a significantly prolonged arthritic foot swelling that was  
27 associated with elevated Th1, NK cell and neutrophil signatures. Immunohistochemistry also  
28 showed a significant increase in the ratio of neutrophils to monocyte/macrophages. The picture  
29 that emerges is reminiscent of enteropathic arthritis, whereby perturbations in the colon are  
30 thought to activate innate lymphoid cells that can *inter alia* migrate to joint tissues to promote  
31 inflammation.

32

33

34 **KEYWORDS**

35 Microplastics; chikungunya virus; enteropathic arthritis; microbiome, innate lymphoid cells,  
36 RNA-Seq, inflammation, mouse

37

38

39

40

41

42

43

44

## 45 INTRODUCTION

46  
47 Global plastic production has increased exponentially and was  $\approx 259$  million metric tons in 2018  
48 (Hirt and Body-Malapel, 2020). When polluted into the environment, these plastics fragment  
49 and degrade into microplastics (MPs) (WHO, 2019)(Dawson et al., 2018). MPs are now  
50 extremely widespread in our environment (Lau et al., 2020) spanning multiple biomes from the  
51 ocean floor (Amaral-Zettler et al., 2020) to near the top of Mt Everest (Napper et al., 2020), with  
52 our epoch being referred to as the age of plastics, the Plasticene (Campanale et al., 2020). We  
53 now even have the plastisphere, with a unique biotope associated with plastic pollution (Amaral-  
54 Zettler et al., 2020). The extensive presence of MPs in our environment means the opportunities  
55 for consumption by humans is widespread (Cox et al., 2019), with MPs readily detectable in  
56 human colons and feces (Ibrahim et al., 2021; Schwabl et al., 2019). Some beverage items have  
57 high levels of MPs, for instance, plastic tea bags (Hernandez et al., 2019), disposable plastic-  
58 lined paper cups (Ranjan et al., 2021), some bottled water (Jin et al., 2021b; Wong et al., 2021),  
59 and infant formula prepared in polypropylene feeding bottles (Li et al., 2020b). Many foods are  
60 contaminated with MPs (Jin et al., 2021b) including bivalves (Garrido Gamarro et al., 2020),  
61 table salt (Zhang et al., 2020) and instant rice products (Dessi et al., 2021). MPs are also found  
62 in the air and are breathed in (Akanyange et al., 2021) and after mucociliary clearance would be  
63 swallowed (Vethaak and Legler, 2021). Even the simple act of opening plastic containers is  
64 associated with MP exposure (Sobhani et al., 2020).

65 The question of whether and how MPs might affect human health remains controversial, with  
66 considerable speculation and a shortage of compelling data (Lim, 2021; Vethaak and Legler,  
67 2021). Although difficult to determine, human MP consumption has been estimated to be  $\approx 175$   
68  $\mu\text{g} - 9 \text{ mg/kg/day}$  (de Wit and Bigaud, 2019; Senathirajah et al., 2021). Studies on the effects of  
69 MPs *in vivo*, primarily in mice have not produced compelling data (Böhmert et al., 2019;  
70 Braeuning, 2019; Deng and Zhang, 2019), with a range of often contradictory results reported  
71 (Hirt and Body-Malapel, 2020; van Raamsdonk et al., 2020). Mice are generally fed polystyrene  
72 (occasionally polyethylene) MP beads ranging in size from  $0.5-1 \mu\text{m}$  (Deng et al., 2018; Luo et  
73 al., 2019a; Stock et al., 2019) to  $150 \mu\text{m}$  (Li et al., 2020a). The approximate MP doses  
74 (converted to weight/kg/day), range from  $\approx 15 \mu\text{g/kg/day}$  (Jin et al., 2019; Lu et al., 2018; Luo et  
75 al., 2019a; Luo et al., 2019b) to  $\approx 20 \text{ mg/kg/day}$  (Deng et al., 2017; Li et al., 2020a; Stock et al.,  
76 2019; Yang et al., 2019), and reach as high as  $100 \text{ mg/kg/day}$  (Deng et al., 2020). In some  
77 studies MPs are found in visceral organs (Deng et al., 2017; Jin et al., 2019), whereas others find  
78 no uptake into the body, even at high doses (Stock et al., 2019). Some studies reported weight  
79 loss in mice after MP consumption (Jin et al., 2021a; Lu et al., 2018; Xie et al., 2020), whereas  
80 others did not (Deng et al., 2017; Deng et al., 2018; Hou et al., 2021; Luo et al., 2019a; Luo et  
81 al., 2019b; Stock et al., 2019; Wang et al., 2021b). Reported adverse effects of MP consumption  
82 include disturbance of lipid/energy metabolism (Deng et al., 2017; Deng et al., 2018; Jin et al.,  
83 2019; Lu et al., 2018; Luo et al., 2019a; Luo et al., 2019b; Zheng et al., 2021), oxidative stress  
84 (An et al., 2021; Deng et al., 2017; Xie et al., 2020), microbiota dysbiosis (Jin et al., 2019; Li et  
85 al., 2020a; Lu et al., 2018), reproductive toxicity (Jin et al., 2021a; Luo et al., 2019a; Luo et al.,  
86 2019b; Park et al., 2020; Xie et al., 2020), overt intestinal perturbations (Jin et al., 2019; Li et al.,  
87 2020a; Luo et al., 2019b; Zheng et al., 2021) and inflammation (Li et al., 2020a; Wang et al.,

88 2021b; Zheng et al., 2021). In contrast, others found no inflammation, oxidative stress or other  
89 adverse health effects (Stock et al., 2019). Although difficult to unravel, some key sources of  
90 artefactual results might include (i) avoidance by mice of MP-containing water because it tastes  
91 or smells tainted (Janssens et al., 1995; Villberg et al., 2004; Villberg et al., 1997) leading to  
92 dehydration and weight loss, (ii) trauma caused by repeated oral gavage (Kinder et al., 2014),  
93 (iii) cage effects leading to artificial microbiome heterogeneity (Basson et al., 2020), (iv)  
94 unrealistically high MP doses that might cause fecal impaction (Issac and Kandasubramanian,  
95 2021) or other gut damage (Yong et al., 2020) and/or (v) the presence of sodium azide in most  
96 commercial sources of plastic beads, with this compound known to be toxic to mammals and  
97 cause oxidative stress (Tat et al., 2021).

98 We and others have previously described in detail a wild-type mouse model of infection and  
99 disease caused by the arthritogenic alphavirus, chikungunya virus (CHIKV) (Suhrieb, 2019).  
100 Mouse infections result in a reproducible robust transient viraemia, joint infection and an overt  
101 self-resolving arthritic foot swelling associated with a prodigious, predominantly mononuclear  
102 inflammatory infiltrate (Gardner et al., 2010; Prow et al., 2019; Prow et al., 2017; Wilson et al.,  
103 2017). CHIKV arthritic inflammation is predominantly driven by Th1 CD4 T cells and to a  
104 lesser extent NK cells (Nakaya et al., 2012; Suhrieb, 2019; Teo et al., 2015), with increased  
105 neutrophils associated with promotion of arthritis in various settings (Poo et al., 2014a; Prow et  
106 al., 2019). Monocytes/macrophages have a role both in promoting viral arthritides and in  
107 resolution of inflammation (Felipe et al., 2020; Labadie et al., 2010; Poo et al., 2014a; Prow et  
108 al., 2019). We chose to challenge mice that had consumed MPs with CHIKV because this  
109 infection results in widespread transcriptional changes (Wilson et al., 2017), providing potential  
110 insights into the effects of MPs on *inter alia* the prodigious anti-viral responses and the  
111 multifactorial, self-resolving, arthritic immunopathology (Suhrieb, 2019).

112 Herein we have addressed the aforementioned potential sources of artifacts in mouse MP  
113 studies, and use RNA-Seq to show that MP consumption leads to a mild proinflammatory  
114 signature in colon, which was associated with exacerbation of a viral arthritic immunopathology.  
115 Overall the study supports the notion that MP consumption can exacerbate immunopathology  
116

## 117 **Results**

### 118 **1 $\mu$ M MPs in drinking water do not enter mouse tissues**

119 In order to provide a detailed insight into the effects of MP consumption in mammals *in vivo*,  
120 C57BL/6J mice were given MPs in their drinking water. The MPs comprised 1  $\mu$ M Sephadex  
121 beads internally loaded with a fluorescent dye, with  $10^6$  MP/ml (0.526  $\mu$ g/ml) added to the  
122 drinking water. The beads were purchased sodium azide-free and were washed prior to use.  
123 MP-supplementation did not affect water consumption, water preference, food consumption or  
124 weight gain (Supplementary Fig. 1a-d). Over a month, mice consumed on average  $3.85 \pm$  SD  
125 0.31 ml water per day per mouse, and  $3.84 \pm$  SD 0.095 ml of water plus MP per day per mouse  
126 (Supplementary Fig. 1a). MP consumption was thus estimated to be  $3.84 \times 10^6$  MP/day/mouse or  
127 2.02  $\mu$ g/day/mouse, which converts to a MP dose of  $\approx 80$   $\mu$ g/kg/day (Fig. 1a). The human  
128 consumption of MP has been estimated to be 0.1 - 5 g per week (de Wit and Bigaud, 2019;  
129 Senathirajah et al., 2021), which converts to a dose of  $\approx 175$   $\mu$ g - 9 mg/kg/day. The oral mouse  
130

131 MP dose used herein is thus comparable with the lower end of the estimated MP consumption in  
132 humans, although clearly 1  $\mu\text{M}$  Sephadex beads do not recapitulate the large size range or  
133 diversity in chemical composition of MPs consumed by humans (Banerjee and Shelver, 2021;  
134 Campanale et al., 2020). Our dose of  $\approx 80 \mu\text{g}/\text{kg}/\text{day}$  is similar to doses used in some previous  
135 rodent studies (Jin et al., 2019; Lu et al., 2018; Luo et al., 2019a; Luo et al., 2019b), but is  
136 considerably lower than, for instance, the  $>20 \text{ mg}/\text{kg}/\text{day}$  doses used in other studies (Deng et al.,  
137 2020; Deng et al., 2017; Li et al., 2020a; Stock et al., 2019; Yang et al., 2019).

138 Whether ingested MPs can, under physiological conditions, traverse the gut lining and enter  
139 the body to any significant degree remains a matter of some speculation (Braeuning, 2019;  
140 Campanale et al., 2020) and may be dose dependent (Stock et al., 2019). Digests of fecal pellets  
141 from mice drinking MP-supplemented water indicated that there were  $\approx 1200 \text{ MP}/\text{mg}$  of feces  
142 (Fig. 1b). As mice produce  $\approx 100\text{-}240$  fecal pellets per day (de Lucia and Ostanello, 2020;  
143 Hoibian et al., 2018), this converts to  $\approx 2.9\text{-}6.7 \times 10^6$  MP excreted per day and  $\approx 3 \times 10^3$  MP per  
144 pellet (mean 24 mg/pellet) (Fig. 1a). This calculation argues that of the  $\approx 3.8 \times 10^6$  MP consumed  
145 per day, most if not all are excreted, perhaps arguing against the concept of bioaccumulation  
146 (Mohamed Nor et al., 2021). Consistent with this observation, we were unable to detect any 1  
147  $\mu\text{M}$  fluorescent MPs in digests of major internal organs and draining lymph nodes after 8 weeks  
148 of drinking MP-supplemented water (Fig. 1b). Some MP were found in digests of washed  
149 intestines (Fig. 1b), although whether this was due to  $<100\%$  effective washing or MP having  
150 entered intestinal tissues cannot be determined using this assay. A previous mouse study  
151 administering  $\approx 500 \mu\text{g}/\text{kg}/\text{day}$  of 1  $\mu\text{M}$  MPs by oral gavage, similarly found no MP in major  
152 internal organs (Stock et al., 2019).

153 Frozen sections of colon from mice that had been drinking MP-supplemented drinking water  
154 for 8 weeks were viewed by florescent microscopy. Although MP could readily be seen in feces,  
155 no MP were seen in intestinal tissues (Supplementary Fig. 2). Most common bacteria are  
156 approximately 1-2  $\mu\text{M}$  in diameter and also do not ordinarily cross the intestinal epithelium (Fine  
157 et al., 2020). Taken together with data in Fig. 1b, these results argue that any adverse effects  
158 associated with MP consumption identified herein are unlikely due to MPs within intestinal  
159 tissues or other organs.

160  
161 **RNA-Seq analysis shows transcriptional changes in the colon after MP consumption**  
162 Previous studies in mice have reported gene expression and histological changes in colons of  
163 mice fed MPs, although MP doses were often considerably higher than those used herein (Jin et  
164 al., 2019; Li et al., 2020a; Lu et al., 2018). To determine whether more physiologically relevant  
165 doses of MPs effect the colon *in vivo*, mice were provided with (+MP) and without MPs (-MP) in  
166 their drinking water (Fig. 1a) for 33 days. Mice were then euthanized and colons removed and  
167 analyzed by RNA-Seq (Supplemental Fig. 1a). The full gene list is provided in Supplementary  
168 Table 1a, with a PCA plot showing a clear segregation of +MP and -MP groups (Supplementary  
169 Fig. 3). Differentially expressed genes (DEGs) are provided in Supplementary Table 1b ( $n=281$ ,  
170  $q<0.05$ ), with a heat map shown in Fig. 2a.

171 The MP consumption described herein thus caused significant transcriptional changes in the  
172 colon, although overall fold changes were low ( $\log_2$  fold change ranged from 1.14 to -1.99). The  
173 exact mechanism whereby MPs cause such changes remains unclear, although interaction

174 between the MPs and the lumen side of the colonic epithelium may be involved as (i) MPs were  
175 not found in the colonic tissues or in the body (Fig. 1b-c), (ii) MPs can effect human colorectal  
176 adenocarcinoma cell line (Caco-2) cultures, with these cells providing an *in vitro* model of the  
177 intestinal epithelium (Banerjee and Shelver, 2021; Huang et al., 2021; Stock et al., 2019) and (iii)  
178 previous mouse studies have suggested MP consumption can affect the mucosal epithelium and  
179 its barrier function (Jin et al., 2019).

180

### 181 **MP consumption results in a mild inflammatory signature in the colon**

182 Ingenuity Pathway Analyses (IPA) of the aforementioned 281 DEGs identified RICTOR as  
183 highly significantly down-regulated Up-Stream Regulator (USR) in the +MP group (Fig. 2b,  
184 light pink shading; Supplementary Table 1c). RICTOR is a key component of the mammalian  
185 Target Of Rapamycin Complex 2 (mTORC2), with active mTORC2 associated with the plasma  
186 membrane and mitochondria (Fu and Hall, 2020). The factors that regulate mTORC2 are not  
187 well understood (Fu and Hall, 2020; Riggi et al., 2020). However, in yeast hyperosmotic shock,  
188 compressive membrane stress and loss of plasma membrane tension can inhibit TORC2 (Le  
189 Roux et al., 2019; Morigasaki et al., 2019), suggesting MP interaction with the plasma membrane  
190 of the mucosal epithelium is involved. PTEN may play a role (Fig. 2b, mTORC2) as PTEN  
191 generates PI(4,5)P2 from PI(3,4,5)P2 (Naderali et al., 2018) and local accumulation of PI(4,5)P2  
192 inhibits TORC2 (Riggi et al., 2020). PI(4,5)P2 also binds N-WASP providing a focus for actin  
193 polymerization (Katan and Cockcroft, 2020; Li et al., 2020c) (for actin signatures see below).  
194 mTORC1 and mTORC2 counter-regulate each other (Fu and Hall, 2020), with a number of  
195 pathway annotations suggesting mTORC1 activity is increased (Fig. 2b, TORC1). Pathway  
196 annotations for the drug, sirolimus (an analogue of rapamycin), and for tuberous sclerosis  
197 complex 2 (TSC2) have negative z-scores and both specifically inhibit mTORC1 (Huang and  
198 Manning, 2008). The Sirtuin Signaling Pathway was significantly down-regulated (Fig. 2b,  
199 TORC1), with sirtuin 1 (SIRT1) also an inhibitor of TORC1 (Chen et al., 2018; Ghosh et al.,  
200 2010). Gene Set Enrichment Analyses (GSEAs) using gene sets from the Molecular Signatures  
201 Database (MSigDB) (Subramanian et al., 2005) also indicated up-regulation of ribosome and  
202 translational activity in the +MP group (Supplementary Table 1e), with mTORC1 a key positive  
203 regulator of ribosome biogenesis and activity (de la Cruz Lopez et al., 2019; Petibon et al., 2021)  
204 (Fig. 2b, green text).

205 The most significant Canonical pathway identified by IPA was up-regulation of Oxidative  
206 Phosphorylation (Fig. 2b, Mitochondria, light pink shading; Supplementary Table 1d).  
207 PPARGC1A, the master regulator of mitochondrial biogenesis, was also up-regulated (Fig. 2b,  
208 Mitochondria; Supplementary Table 1c). Up-regulation of mitochondrial activity was supported  
209 by Cytoscape analysis (Supplementary Table 1f), as well as GSEAs using gene sets from  
210 MSigDB (Supplementary Table 1g) and Blood Transcription Modules (BTMs) (Li et al., 2014)  
211 (Supplementary Table 1h). Increased mitochondrial activity has been associated with down-  
212 regulation of mTORC2/TORC2 activity in a wide range of settings (Colombi et al., 2011;  
213 Heimbucher et al., 2020; Oh et al., 2017; Riggi et al., 2020; Watson et al., 2019), with mTORC1  
214 a well-known positive regulator of mitochondrial biogenesis and functions (de la Cruz Lopez et  
215 al., 2019). Increased mitochondrial activity increases production of reactive oxygen species  
216 (ROS), with several signatures indicating that MP consumption increased the levels of ROS (Fig.

217 2b, ROS). NRF1 and NRF2 sense oxidative stress and activate anti-oxidant defenses (Schultz et  
218 al., 2014; Zhu et al., 2019). In epithelial tissues ROS also activate FOXO1, leading to induction  
219 of anti-oxidant and repair activities (Graves and Milovanova, 2019).

220 Inflammation signatures were evident in colons of mice consuming MPs (Fig. 2b,  
221 Inflammation). Some of these can be associated with elevated levels of ROS (Fig. 2b,  
222 Inflammation, top box). HMGB1 requires oxidation for secretion and is a central pro-  
223 inflammatory mediator that is also involved in tissue healing and regeneration (Chen et al., 2016;  
224 Kwak et al., 2020; Li et al., 2013; Son et al., 2020). TGFB1 is abundantly expressed in the  
225 intestine and is up-regulated in inflammatory bowel disease (Ihara et al., 2017), and its activity is  
226 positively regulated by ROS (Liu and Desai, 2015; Zhang et al., 2019). A CD3 signature  
227 suggested activation of T cells and or NKT cells (Brailey et al., 2020), with ROS well known to  
228 stimulate a range of proinflammatory activities including T cell activation (Franchina et al.,  
229 2018; Murphy and Siegel, 2013; Yarosz and Chang, 2018). Other inflammation signatures (Fig.  
230 2b, Inflammation, bottom box) included DDX5, which was recently shown to promote intestinal  
231 inflammation (Abbasi et al., 2020). IL-8 is a key neutrophil attractant in IBD (Kessel et al.,  
232 2021; Singer and Sansonetti, 2004) and N-Formylmethionine-leucyl-phenylalanine (fMLP)  
233 mimics the neutrophil chemoattractant and activating activity of a bacterially-derived family of  
234 formylated peptides that are believed to promote inflammatory bowel diseases (Somasundaram et  
235 al., 2013; Tsai et al., 2016). CXCR4 (the receptor for CXCL12) is involved in tissue repair, with  
236 the heterocomplex CXCL12:HMGB1 more active than CXCL12 alone (Bianchi and Mezzapelle,  
237 2020).

238 A number of IPA pathway annotations indicated that MP consumption promoted actin  
239 reorganization (Fig. 2, Actin reorganization). mTORC2 has been shown to be a key regulator of  
240 actin organization and remodeling in a wide range of settings including perturbations in the  
241 plasma membrane, with this activity involving Rho GTPases such as RhoA and Rac (Diz-Munoz  
242 et al., 2016; Li et al., 2020c; Sato et al., 2016; Wu et al., 2016; Xie et al., 2018; Yasuda et al.,  
243 2015). GSEAs using BTM gene sets also indicated down-regulation of genes associated with  
244 integrin interactions and the extracellular matrix (Fig. 2, Blue text), with integrins and the actin  
245 network closely linked in a series of cellular activities (Romero et al., 2020).

246

#### 247 **CHIKV infection, weight, viremia and RNA-Seq of colon**

248 Mice drinking water supplemented with (+MP) or without MP (-MP) for 28 days were infected  
249 with CHIKV. Mice from both +MP+CHIKV and -MP+CHIKV groups lost a small amount of  
250 body weight ( $\approx 3\%$ ) by day 2 post infection, with mice in the +MP+CHIKV group recovering  
251 their weight significantly faster than mice in the -MP+CHIKV group (Supplementary Fig. 4a).  
252 The +MP+CHIKV and -MP+CHIKV groups showed similar levels of viremia; this was true both  
253 for the mice from which colons were harvested for RNA-Seq analyses (Fig. 2c) and (ii) for two  
254 additional independent repeat experiments (Supplementary Fig. 4b).

255 RNA-Seq analysis for day 5 colons (+MP+CHIKV vs -MP+CHIKV) (Supplementary Fig. 4c  
256 Supplementary Table 2a) provided only 7 DEGs (Supplementary Table 2b). GSEAs using BTM  
257 gene sets identified multiple dominant signatures associated with T, B, antigen presenting cells  
258 (APCs) and NK cells (Fig. 2d; Supplementary Table 2c). GSEAs using MSigDB gene sets  
259 contained related signatures, but also identified (as the signature with the lowest NES score) a

260 gene set associated with proliferating (Ki67<sup>hi</sup>) enterocyte progenitors (Gao et al., 2018) (Fig. 2d,  
261 Supplementary Table 2d). Five days after CHIKV infection, MP consumption thus appears to  
262 have promoted a mild increase in lymphocyte infiltrates in the colon. The mild reduction in  
263 enterocyte renewal also suggests MP consumption was somehow protective, reducing the need  
264 for tissue repair.

265  
266 **Low viral loads in the colon and a CHIKV-induced goblet cell response**  
267 The CHIKV levels in the colon on day 5 post infection (as measured by qRT PCR and viral  
268 titrations) were quite variable, with many samples showing no detectable virus (Supplementary  
269 Fig. 4c,d). This variability may have contributed to the inability to identify many DEGs in colon  
270 for the RNA-Seq analysis of +MP+CHIKV vs -MP+CHIKV. Viral loads were perhaps  
271 marginally lower for the +MP+CHIKV group; however, this was not significant (Supplementary  
272 Fig. 4c,d).

273 A goblet cell signature was identified with a negative z-score (using MSigDB gene sets) for  
274 day 5 colon +MP+CHIKV vs -MP+CHIKV (Supplementary Table 2d), with reduced colon  
275 goblet cell staining previously reported after MP consumption (Lu et al., 2018). However,  
276 AB/PAS staining and Aperio pixel count image analysis, showed no significant effect of MP  
277 consumption on goblet cell staining (Supplementary Fig. 5). In contrast, CHIKV infection (i.e. -  
278 MP+CHIKV vs +MP, and +MP+CHIKV vs -MP) did show a significant change in AB/PAS  
279 staining indicating hyperplasia of goblet cells (Supplementary Fig. 5), which can often be seen  
280 after enteric infections (Kim and Khan, 2013).

281  
282 **Prodigious CHIKV infection signatures in the colon despite low infection levels**  
283 RNA-Seq analyses of both +MP+CHIKV vs +MP and -MP+CHIKV vs +MP, showed a series of  
284 prodigious CHIKV-induced responses (Supplementary Table 3). These responses may  
285 overwhelm (by magnitude and variability) any mild effects associated with MP consumption,  
286 perhaps again contributing to the low number of DEGs for +MP+CHIKV vs -MP+CHIKV (n=7).

287 The CHIKV responses in the colon showed highly significant correlations with responses  
288 previously reported for CHIKV-infected feet (Wilson et al., 2017) (Supplementary Fig. 6). When  
289 day 5 colon RNA-Seq reads were mapped to the CHIKV genome, 0 to 0.0005% of reads mapped  
290 to the viral genome. This represents a relatively low level of infection when compared with  
291 feet, where up to 8% of reads mapped to the CHIKV genome (Wilson et al., 2017). The high  
292 level of correlation (Supplementary Fig. 6) despite the low viral loads in the colon, may (at least  
293 in part) be explained by responses arising from the circulating proinflammatory cytokines  
294 induced by this systemic infection (Gardner et al., 2010).

295  
296 **Mild inflammation and leukocytosis signatures in MLN after MP consumption**  
297 RNA-Seq analysis of mesenteric lymph nodes (MLN) for +MP vs -MP provided only one DEG  
298 (Supplementary Fig. 7a; Supplementary Table 4a). MLNs from mice taken 33 and 41 days after  
299 initiation of MP consumption were combined in a single analysis (Supplementary Fig. 7a).  
300 GSEAs using BTM and MSigDB gene sets suggested the +MP group had signatures associated  
301 with increased inflammation and increased leukocytes (Fig. 3a; Supplementary Table 4b, c);  
302 findings consistent with the increased inflammation and leukocyte migration signatures identified



303 in colon (Fig. 2b).

304

### 305 **MP consumption promoted lymphocytosis in MLNs 9 days after CHIKV infection**

306 After 28 days +MP and -MP groups were infected with CHIKV, with RNA-Seq analysis of  
307 MLNs day 5 after CHIKV infection providing no compelling DEGs (Supplementary Table 4d).  
308 In contrast, on day 9 post infection 282 DEGs for +MP+CHIKV vs -MP+CHIKV were  
309 identified, although fold changes were low, ranging from  $\log_2$  0.87 to -0.71 (Supplementary Fig.  
310 7b, Supplementary Table 4e,f). IPA analysis of the 282 DEGs provided a series of annotations  
311 indicating that the +MP+CHIKV MLNs had significantly more lymphocytes and T cells (Fig. 3b,  
312 Lymphocytes/leukocytes). In support of this finding, GSEAs using BTMs identified T cell and  
313 NK signatures in this group with significant positive NES scores (Fig. 3b; Supplementary Table  
314 4i). Curiously, IPA USR analysis argued that T cell stimulation was decreased, with a highly  
315 significant negative z-score for MYC (Fig. 3b, T cell stimulation). MYC is a master regulator of  
316 metabolic programming in activated T cells (Shyer et al., 2020). TCR and CD28 (T cell  
317 costimulation) signatures also showed negative z-scores (Fig. 3b, T cell stimulation). The  
318 dominant feature of the DEG list was that 51 of the 124 down-regulated genes represented  
319 mRNAs encoding ribosomal proteins (Supplementary Table 4f) (Fig. 3b. Ribosome mRNAs).  
320 Although many factors can regulate ribosome biogenesis (Petibon et al., 2021), a dominant  
321 feature of antigen-specific T cell activation is stimulation of ribosome biogenesis (Galloway et  
322 al., 2021). These results may suggest that, although there were more T cells in the MLN of the  
323 +MP+CHIKV group, overall they were less activated (Tan et al., 2017), with the  
324 lymphocytosis/leukocytosis perhaps diluting antigen-specific T cells.

325 As the down-regulated DEGs may be due (at least in part) to dilution effects, the up-regulated  
326 DEGs (n=158) were analyzed separately by IPA. This analysis thus reveals the processes that  
327 are being promoted, despite any dilution effects. OSM, a biomarker for inflammatory bowel  
328 disease (Verstockt et al., 2021), was returned as a significant USR (Fig. 3b, Inflammation;  
329 Supplementary Table 4g, column AC). OSM can also drive intestinal inflammation in mice  
330 (West et al., 2017) and can promote Th1 responses (Jung et al., 2010). Although overall fold  
331 changes were low, only one ribosomal protein was up-regulated, Rps6ka3 (RSK2)  
332 (Supplementary Table 4f), a protein associated with promoting Th17 responses in mice (Takada  
333 et al., 2016). Altered CD4 T cell polarization were also suggested in the +MP+CHIKV group by  
334 GSEAs using MSigDB data sets (Supplementary Table 4j).

335 The IPA Diseases or Functions analysis returned a number of virus infection annotations with  
336 positive z scores, suggesting increased virus infection in day 9 MLNs from the +MP+CHIKV  
337 group, when compared with the -MP+CHIKV group (Supplementary Table 4h). These  
338 annotations are hard to reconcile with (i) the lack of differences in viremia (Fig. 2c,  
339 Supplementary Fig. 4a), (ii) although not significant, the lower viral loads in the colons of the  
340 +MP+CHIKV group (Supplementary Fig. 4d, e), and (iii) the lack of any viral reads in RNA-Seq  
341 data for day 9 MLN (Supplementary Fig. 7c). In addition, the up-regulated DEGs that gave rise  
342 to the virus infection annotations (Supplementary Fig. 7d) were all associated with negative  
343 regulation of metabolic processes when analyzed by Gene Ontology (Supplementary Fig. 7e).  
344 This result is clearly not consistent with viral signatures, but is consistent with the  
345 aforementioned down-regulation/dilution of T cell activation signatures in +MP+CHIKV MLNs.

346 In summary, on day 9 post CHIKV infection, MP consumption was associated with a small  
347 change in the transcriptional profile in the MLNs that suggested a lymphocytosis/leukocytosis,  
348 with indications of increased inflammation and changes in T cell polarization.

349

### 350 **CHIKV arthritic foot swelling is significantly prolonged after MP consumption**

351 After 28 days of drinking water supplemented with MP (+MP) or without MP (-MP), mice were  
352 infected with CHIKV. The food and water consumption was not significantly different for the  
353 +MP+CHIKV vs -MP+CHIKV groups after CHIKV infection (Supplementary Fig. 1a,c). The  
354 viremia was also not significantly different for these groups (Fig. 2c, Supplementary Fig 4b).

355 Overt CHIKV arthritic foot swelling in C57BL/6J mice usually peaks on day 6-7 post  
356 infection and then resolves (Gardner et al., 2010; Prow et al., 2019). Although the increased  
357 peak foot swelling between +MP+CHIKV and -MP+CHIKV groups did not reach significance,  
358 significantly greater foot swelling was seen on several days after the peak of foot swelling (Fig.  
359 4a). The same result was seen in a repeat experiment, with significantly prolonged foot swelling  
360 again observed in the +MP+CHIKV group (Supplemental Fig. 8a). Feet from mice (n=4 feet  
361 from 4 mice per group) were taken day 9 post infection for RNA-Seq analysis (Fig. 4a, blue  
362 arrow), with these mice representing a subset of the mice shown in Fig. 4a. The swelling in these  
363 4 feet per group was also significantly different for the +MP+CHIKV vs -MP+CHIKV groups  
364 (Supplemental Fig. 8b).

365 The prolonged foot swelling was not associated with increased viral loads in the feet as neither  
366 tissue titers on day 5, or CHIKV reads from RNA-Seq analysis of feet on day 9 post infection,  
367 showed any significant differences (Fig. 4b).

368

### 369 **MP consumption increases Ly6G/F4/80 ratios in arthritic feet after CHIKV infection**

370 A prodigious inflammatory infiltrate is well described for CHIKV arthritis in this model  
371 (Gardner et al., 2010; Nguyen et al., 2020; Poo et al., 2014b; Wilson et al., 2017) and for  
372 alphaviral arthritides generally (Lin et al., 2020; Suhrbier, 2019; Suhrbier et al., 2012). Although  
373 CHIKV infection (i.e. +MP+CHIKV vs +MP and -MP+CHIKV vs +MP) did show the expected  
374 significant increases, no significant differences in the level or density of leukocyte infiltrates was  
375 observed between +MP+CHIKV and -MP+CHIKV groups (Supplementary Fig. 8c,d). This  
376 argues that the increased foot swelling for the +MP+CHIKV vs MP+CHIKV group, was not  
377 predominantly due to increased levels of edema.

378 To investigate whether the composition of the inflammatory infiltrates were changed by MP  
379 consumption, immunohistochemistry (IHC) was undertaken on feet day 9 post infection  
380 (Supplementary Fig. 9) and staining quantitated by Aperio pixel count (Fig. 4c-g). F4/80 is  
381 generally considered to be a marker for tissue-residing monocytes (generally F4/80 low) and  
382 macrophages (F4/80 positive). A prodigious monocyte/macrophage infiltrate is well described  
383 for CHIKV arthritis and alphaviral arthritides generally (Gardner et al., 2010; Lin et al., 2020;  
384 Suhrbier, 2019; Suhrbier et al., 2012). Thus as expected, IHC using a F4/80 showed significantly  
385 elevated staining after CHIKV infection. However, no significant difference ( $p=0.2$ , t test)  
386 between +MP+CHIKV and -MP+CHIKV groups was observed (Fig. 4c). Increased numbers of  
387 infiltrating neutrophils have been associated with exacerbation of arthritis in this model (Poo et  
388 al., 2014a; Prow et al., 2019) and other CHIKV mouse models (Cook et al., 2019). IHC using

389 the neutrophil marker, Ly6G, showed significant increases associated with CHIKV infection  
390 (Fig. 4d), but comparison between +MP+CHIKV versus -MP+CHIKV did not reach significance  
391 ( $p=0.082$ , t test). However, when the Ly6G/F4/80 ratio was calculated for each foot, the  
392 +MP+CHIKV group showed a significant increase in this ratio (Fig. 4e). An increase in this  
393 ratio has been associated with a proinflammatory phenotype in a number of settings (Huang et  
394 al., 1999; Malerba et al., 2006; Martinez Gomez et al., 2013; Pawlaczyk et al., 2008).

395 T cells, and to a lesser extent NK cells, are known to promote arthritis in this model (Suhrbier,  
396 2019; Teo et al., 2015). However, there were no significant difference in CD3 (T cell) staining  
397 between +MP+CHIKV and -MP+CHIKV groups, although as expected (Gardner et al., 2010),  
398 CHIKV infection induced a significant increase in CD3 staining (Fig. 4f). NK staining (NKp46)  
399 showed similar results to CD3 staining (Fig. 4g). Eosinophils were recently linked to skeletal  
400 muscle wound healing (Hazlewood et al., 2021) and may have an anti-inflammatory role in this  
401 CHIKV arthritis mouse model (Poo et al., 2014a). However, no significant differences in  
402 eosinophil staining was apparent between +MP+CHIKV and -MP+CHIKV groups (Fig. 4h;  
403 Supplementary Fig. 9).

404  
405 **MP consumption has no discernable effect on the transcriptional profile in feet**  
406 Mice drinking MP-supplemented drinking water for 37 days (28 + 9 days) (no CHIKV infection)  
407 were analyzed by RNA-Seq (Supplemental Fig. 10a). Only one DEG, a putative gene, was  
408 identified for the +MP vs -MP comparison in feet before CHIKV infection (Supplementary  
409 Table 5a). The result is consistent with the lack of a discernable difference in foot measurements  
410 (Supplemental Fig. 10b) and IHC (Fig. 4c-h) for the +MP vs -MP groups in the absence of  
411 CHIKV infection.

412  
413 **MP consumption prolongs Th1 responses in CHIKV arthritis**  
414 Mice drinking water with and without MP for 28 days were infected with CHIKV and on day 9  
415 post infection feet were harvested for RNA-Seq. PCA plots showed a clear separation of the two  
416 groups (Supplementary Fig. 10c), with 1202 DEGs identified when a  $q<0.05$  filter was applied  
417 (Supplementary Table 5b). As a large number of these DEGs had low fold changes, and in order  
418 to focus bioinformatic treatments on the more significant transcriptional changes, we increased  
419 the significance stringency to  $q<0.01$ , which provided 460 DEGs (Supplementary Table 5c).

420 Analyses of the 460 DEGs using a IPA, Cytoscape, and GSEAs with MSigDB and BTMs,  
421 provided multiple annotations associated with increased inflammation and immune activation for  
422 +MP+CHIKV vs -MP+CHIKV (Supplementary Table 5d-i), consistent with the increase foot  
423 swelling in the +MP+CHIKV group (Fig. 4a). Th1 CD4 T cells are thought to be the major  
424 drivers of CHIKV arthropathy (Suhrbier, 2019), with multiple signatures indicating increased  
425 Th1 bias in the arthritic feet of the +MP+CHIKV group (Fig. 5, Th1; Supplementary Table  
426 5d,e,h). NK cells also contribute to arthritis in this model (Suhrbier, 2019; Teo et al., 2015), with  
427 the top IPA Canonical Pathway annotations indicating increased NK cell activity in  
428 +MP+CHIKV feet (Fig. 5, NK activity; Supplementary Table 5d). Some NK annotations were  
429 also seen in IPA Diseases or Functions (Fig. 5, NK activity; Supplementary Table 5f), and in  
430 GSEAs using BTMs (Supplementary Table 5i).

431 Cytoscape analysis of the down-regulated DEGs was dominated by skeletal muscle  
432 annotations (Fig. 5, Skeletal Muscle; Supplemental Table 5g), indicating increased muscle cell

433 damage in the +MP+CHIKV group. Myositis and muscle damage is well described in this  
434 mouse model (Gardner et al., 2010; Nakaya et al., 2012; Prow et al., 2019) and was clearly  
435 evident by H&E staining of feet taken day 9 post infection (Supplementary Fig 10d).

436 The BTM GSEAs suggested an increase in monocytes (Fig. 5, Monocytes; Supplementary  
437 Table 5h), perhaps consistent with the Th1 bias (De Koker et al., 2017; Iijima et al., 2011).  
438 Macrophage annotations were ranked relatively lower, and suggested mild up-regulation of  
439 activity in the +MP+CHIKV group (Supplementary Table 5d,f,h). Although macrophages  
440 contribute to the pathogenesis of alphaviral arthritides, they are also important for disease  
441 resolution, which would be expected to be underway by day 9 (Prow et al., 2019). A transition  
442 from inflammatory macrophages to resolution phase macrophages (Schroder et al., 2019) is  
443 associated with removal of neutrophils, and represents a common theme for returning to  
444 hemostasis after tissue damage (Soehnlein and Lindbom, 2010). Using GSEA and a macrophage  
445 resolution signature described previously (Prow et al., 2019), a highly significant positive  
446 enrichment occurred in the +MP+CHIKV group, suggesting that increased inflammation led to  
447 increased resolution phase activity, and that prolonged foot swelling was not associated with a  
448 loss of resolution phase activity (Supplementary Fig. 10e).

449 Although relatively less dominant than the Th1 signatures, a series of neutrophil-associated  
450 annotations were evident in the +MP+CHIKV group (Fig. 5, Neutrophils; Supplementary Table  
451 5d,f,h,i), consistent with the increased Ly6G/F4/80 staining ratios (Fig. 4e). Increased  
452 neutrophils have previously been associated with promotion of arthritis and foot swelling in this  
453 model (Poo et al., 2014a; Prow et al., 2019).

454 The IPA USR analysis of the 460 DEGs also provided a series of significantly up-regulated  
455 type I interferon response annotations (Supplementary Table 5e; Interferon alpha, IFN $\beta$ 1, IRF1,  
456 IRF7). Such annotations are prominently associated with CHIKV infection (Wilson et al., 2017);  
457 however, there were no significant differences in viral loads between +MP+CHIKV and -  
458 MP+CHIKV (Fig. 4d). The sustained IFN $\gamma$  responses (Fig. 5, Th1) may have prolonged or  
459 sustained generation of type I IFN responses during the course of CHIKV infection (Eloranta et  
460 al., 1997) in +MP+CHIKV group.

461

#### 462 **No significant effects of MP consumption on the gut microbiome**

463 A number of studies in a range of species (Fackelmann and Sommer, 2019; Hirt and Body-  
464 Malapel, 2020), including mice (Jin et al., 2019; Li et al., 2020a; Lu et al., 2018), have described  
465 alterations in the gut microbiome or dysbiosis mediated by MP ingestion. In this CHIKV mouse  
466 model arthritis can also be influenced by a high fiber diet (Prow et al., 2019) and the microbiome  
467 can also influence antiviral resistance (Winkler et al., 2020). To determine whether the enhanced  
468 arthritis after MP consumption described above might be associated with MP-induced dysbiosis,  
469 the fecal microbiome was investigated over time using an experimental set-up that sought to  
470 minimize the influence of facility and cage effects on the results of the microbiome analyses  
471 (Basson et al., 2020; Parker et al., 2018). Such effects are now well recognized as potentially  
472 compromising interpretation of mouse microbiome studies (Basson et al., 2020; Parker et al.,  
473 2018). The results (Supplementary Table 6a-e) showed no significant differences for +MP  
474 versus -MP groups after 28 days of MP consumption at the genus (Fig. 6a), class (Supplementary  
475 Fig. 11) or phylum levels (Supplementary Fig. 12), with the comparisons involving 24 mice and

476 8 cages per group. Note both +MP and -MP had two independent replicate groups on days 0 and  
477 28 (Fig. 6a).

478 Principle component analyses (PCA) (Fig. 6b, top graph) and Shannon Diversity Indices (Fig.  
479 6c, top graph), both based on Operational Taxonomic Units (OTUs) (Mandal et al., 2015), again  
480 showed no significant effect on the microbiome after 28 days of MP consumption. As expected,  
481 individual cage effects (Basson et al., 2020) were clearly discernable (Fig. 6b and c; bottom  
482 graphs), but on average no significant effect of MP's consumption on the microbiome emerged.

483

#### 484 **CHIKV infection can effect Firmicutes/Bacteroidetes ratios**

485 On day 28 after initiation of MP consumption, two groups of mice were infected with CHIKV  
486 and the microbiome was analyzed on day 0, 5, 9 and 21 post infection (Supplementary Table 6a-  
487 i). After CHIKV infection, no significant differences emerged at any time point for  
488 +MP+CHIKV versus -MP+CHIKV (or the remaining +MP and -MP groups) at the genus (Fig.  
489 6a), class (Supplementary Fig. 11) or phylum levels (Supplementary Fig. 12). However, from  
490 day 0 to day 5 in the -MP+CHIKV group, there was a significant increase in Firmicutes and a  
491 significant decrease in Bacteroidetes (Fig. 7a; Supplementary Table 6j). Although the  
492 +MP+CHIKV group had the same directions of change in these bacterial phyla, these did not  
493 reach significance (Fig. 7a; Supplementary Table 6j).

494 Changes in Firmicutes/Bacteroidetes (F/B) ratios are widely accepted as representing a  
495 biomarker of dysbiosis (Stojanov et al., 2020), so the fold changes in F/B ratios from day 0 to  
496 days 5, 9 and 21 were plotted for individual mice (Fig. 7b). On day 5 post infection, mice  
497 appeared to segregate into two populations, with 8/12 mice in the -MP+CHIKV group and 6/12  
498 in the +MP+CHIKV group showing a relatively high increase in their fecal F/B ratios (Fig. 7b,  
499 green data points), compared to the remaining mice that showed only a low change (Fig. 7b, blue  
500 data points). When the viremias for the two populations were plotted they showed a significant  
501 difference on day 4 post CHIKV infection for both the -MP+CHIKV and the +MP+CHIKV  
502 groups (Fig. 7c). However, increased or low F/B ratio changes and the associated effects on  
503 viremia on day 4, did not translate to significant differences in foot swelling (Supplementary Fig.  
504 13). Increased viremia on day 4 also correlated with increased abundance of Firmicutes and  
505 decreased abundance of Bacteroidetes, although in the +MP+CHIKV group this only approached  
506 significance (Fig. 7d). Finally, the distinction between high and low F/B ratio changes (at the  
507 phylum level) was maintained at the OTU level, with PCA plots showing a clear separation (Fig.  
508 7e).

509 There was therefore no indication from these studies that MP consumption had a significant  
510 effect on the microbiome. Nevertheless, CHIKV infection did appear to affect the microbiome,  
511 with increased viremias associated with relatively high increases in F/B ratios. Increases in  
512 Firmicutes were primarily driven by increases at the genus level of Lachnospiraceae and  
513 Clostridiales, and decreases in Bacteroidetes primarily driven by a decrease at the genus level of  
514 S247 (Supplementary Table 6k). That a higher F/B ratio caused the increases in viraemia is  
515 perhaps less likely given (i) the F/B ratio change was relative to day 0 post infection and (ii) a  
516 *Clostridium* species (phylum Firmicutes) was shown to promote antiviral activity (Winkler et al.,  
517 2020), whereas in our data more Firmicutes correlated with more virus (Fig. 7d).

518

## 519 **DISCUSSION**

520 We show herein that the consumption of MP predisposes mice to a prolonged arthritis after  
521 CHIKV infection. This occurred in the absence of any detectable MPs entering the body or any  
522 significant effects of MP consumption on the microbiome. RNA-Seq and bioinformatic analyses  
523 argue that MP consumption leads to a mild increase in gut inflammation. This then predisposed  
524 the viral arthritis to an extended immunopathology characterized by elevated Th1 biased, and to a  
525 lesser extent, Th17 biased, signatures.

526 The picture that emerges is reminiscent of enteropathic arthritis. A connection between bowel  
527 pathology and arthritis has long been recognized (Ashrafi et al., 2021), with the arthritis that is  
528 often associated with Inflammatory Bowel Disease (IBD) now referred to as enteropathic  
529 arthritis (Farisogullari et al., 2021; Gutiérrez-Gonzalez et al., 2020; Picchianti-Diamanti et al.,  
530 2020). The mechanism(s) underpinning the causal relationship whereby inflammation in the gut  
531 leads to inflammation in the joints remain poorly characterized and often speculative.  
532 Nevertheless, migration of Innate Lymphoid Cells (ILCs), in particular ILC1 and ILC3 have  
533 recently been implicated, with these cells detecting gut damage or perturbation, becoming  
534 activated and migrating into joint tissues and promoting Th1 and Th17 driven arthritis (Fang et  
535 al., 2020; Neerinx et al., 2015). ILCs are broadly divided into three categories ILC1, ILC2 and  
536 ILC3 cells, which to some extent mirror the function of Th1, Th2 and Th17 T cells, respectively,  
537 without displaying any antigen specificity (Jarade et al., 2021; Vivier et al., 2018). We derived  
538 gene sets from a series of papers and used these in GSEAs to identify potential ILC signatures  
539 (Supplementary Table 7). After CHIKV infection, MP consumption was associated with  
540 significantly enriched ILC1 signatures in colon, MLN and feet, with ILC3 signatures seen in  
541 MLNs and feet, and ILC2 signatures seen only in feet (Supplementary Fig. 14). These analyses  
542 are consistent with the proposed model of enteropathic arthritis (Fang et al., 2020), although  
543 ILC1 signatures would be difficult to distinguish from NK signatures (McFarland et al., 2021) in  
544 whole tissues where NK cells are also present (Fig. 5, NK cell activity). Another role of ILCs is  
545 protection of the gut from infection (Shannon et al., 2021) and maintenance of gut homeostasis  
546 (Diefenbach et al., 2020), which may explain the slightly lower viral loads in the colon  
547 (Supplementary Fig. 4d,e), lower epithelial repair signatures in the colon (Fig. 2d) and the better  
548 weight recovery in the +MP+CHIKV group (Fig. 4a). Faster weight recovery and prolonged  
549 arthritis after CHIKV infection did not correlate (Supplementary Fig. 15), supporting the notion  
550 that these are independent outcomes of MP consumption and ILC stimulation.

551 A central question remains regarding how low levels of MP consumption might cause gut  
552 perturbations. One might speculate this involves low level (Supplementary Table 1b),  
553 histologically undetectable (Supplementary Fig. 5a), epithelial cell plasma membrane disruption  
554 in the colon. This contention is consistent with (i) the signatures described in Fig. 2b, which  
555 suggest a plasma membrane signaling response (Le Roux et al., 2019; Morigasaki et al., 2019),  
556 (ii) the lack of MP uptake (Fig. 1b), and (iii) the large volume of literature on plasma membrane  
557 damage by MPs in cell lines *in vitro*, which also report oxidative stress as a consequence  
558 (Banerjee and Shelver, 2021; Wang et al., 2021a). Although MPs are well recognized as ideal  
559 abrasive agents for cosmetics (Bilal et al., 2020; Kozłowska et al., 2019), most humans and  
560 animals constantly swallow sand dust, which might be expected to have similar abrasive effects  
561 (Karadima et al., 2021). One could speculate that specific hydrophobicity characteristics of MPs

562 (Pham et al., 2021) may facilitate their ability to perturb or disrupt the plasma membrane directly  
563 (McKarns et al., 1997; Ogbourne et al., 2004). Alternatively, although we were unable to see  
564 any significant overall differences in the microbiota, MPs coated with certain bacteria/biofilms  
565 (Miao et al., 2019; Ogonowski et al., 2018; Ribet and Cossart, 2015; Wu et al., 2019) may  
566 somehow adversely affect enterocyte plasma membranes (Ammendolia et al., 2021; Peterson and  
567 Artis, 2014). Another conceivable possibility is that MPs adsorb (Yu et al., 2021) certain  
568 chemicals (e.g. hydrophobic bile salts (Sagawa et al., 1993)) that then imbues the MP with  
569 pathogenic properties (Stenman et al., 2013). Future mechanistic studies are clearly warranted.

570 Although the mechanism of gut perturbation remains speculative, this paper provides  
571 compelling evidence that MP consumption, without causing overt microbiome or gut changes or  
572 entering the body, can nevertheless significantly exacerbate the immunopathology associated  
573 with a viral arthritis. If MPs do indeed activate ILCs in the gut, and ILCs become a systemic  
574 immunological conduit (Fang et al., 2020; Neerinx et al., 2015), one might speculate that MPs  
575 could dysregulate inflammation in a range of conditions (Benezech and Jackson-Jones, 2019;  
576 Fernando et al., 2021; Maleki et al., 2020).

577

#### 578 **Acknowledgements**

579 From QIMR Berghofer MRI we thank Dr I Anraku for managing the PC3 (BSL3) facility, Dr  
580 Clay Winterford and Crystal Chang for the histology and immunohistochemistry, the animal  
581 house staff for mouse breeding and agistment, and Dr. Gunter Hartel for assistance with  
582 statistics. We also thank Dr S.M. Bengtson Nash (Griffith University) for helpful discussions.

583

#### 584 **Author Contributions**

585 Conceptualization, A.S.; Methodology, D.J.R. and A.S.; Formal analysis, D.J.R., A.S., T.D., and  
586 C.B.; Investigation, D.J.R., T.L., K.Y, and B.T.; Data curation, D.J.R., A.S., T.D., and C.B.;  
587 Writing – original draft, A.S. and D.J.R.; Writing – review and editing, A.S., D.J.R. and T.D.;  
588 Visualization, D.J.R., A.S., T.D., and C.B.; Supervision, D.J.R. and A.S.; Project administration,  
589 A.S.; Funding acquisition, A.S.

590

#### 591 **Declaration of Interests**

592 The authors declare no competing interests.

593

#### 594 **Funding**

595 The work was funded by the National Health and Medical Research Council (NHMRC) of  
596 Australia (Investigator grant APP1173880 awarded to A.S.). The funders had no role in study  
597 design, data collection and analysis, decision to publish, or preparation of the manuscript.

598

#### 599 **FIGURE LEGENDS**

600 **Figure 1. Detection of MP *in vivo*.** **a** Mice were given drinking water supplemented with  $10^6$   
601 MP/ml for 8 weeks and MP consumption measured by weighing of water bottles. Calculations  
602 for MP excretion in fecal pellets derived from data in b. **b** After 8 weeks of MP consumption the  
603 indicated organs and fecal pellets were collected (n=3-6 mice per sample), weighed (wet weight)  
604 and digested with SDS and proteinase K. MPs in the digests were counted using a

605 haemocytometer and a fluorescent microscope; the inserted florescent image shows MPs from a  
606 digest of a fecal pellet. **c** Formalin fixed colon after 8 weeks of MP consumption. H&E staining  
607 showing orientation of sectioning across the colon (left). An image from a frozen section (7  $\mu$ m)  
608 of colon viewed under a fluorescent microscope (middle), with a phase contrast image of the  
609 same region (right). MPs are indicated by arrows; M - mucosa, F - fecal material. More  
610 fluorescent images are shown in Supplementary Fig. 2.

611  
612 **Figure 2. RNA-Seq of colon from mice drinking water +MP versus -MP before and after**  
613 **CHIKV infection.** **a** RNA-Seq was used to compare colons from mice drinking MP (+MP) with  
614 colons from mice drinking water without MP (-MP) for 28 days. DEGs (n=281) were identified  
615 (Supplementary Table 1b) and expression levels for each gene and for each mouse shown as a  
616 heat map of the ratio of normalised (DESeq2) log<sub>2</sub> expression levels relative to the mean of log<sub>2</sub>  
617 normalised expression levels for each gene across all mice. **b** The DEGs (n=281) were analyzed  
618 by Ingenuity Pathway Analysis (IPA) (direct and indirect); black text – IPA Up-Stream  
619 Regulators (USRs) (full list in Supplementary Table 1c), purple text - IPA Canonical pathways  
620 (full list in Supplementary Table 1d) and brown text - IPA Diseases or Functions annotation.  
621 Light pink shading indicates the dominant highly significant pathways. The full +MP versus -  
622 MP gene list (Supplementary Table 1a) was also interrogated by Gene Set Enrichment Analyses  
623 (GSEAs) using genes sets from; green text - Molecular Signatures Database (MSigDB) (full list  
624 in Supplementary Table 1e) and blue text - Blood Transcription Modules (BTMs) (full list in  
625 Supplementary Table 1g). Upward pointing blue arrows indicate up-regulation and downward  
626 pointing blue arrows indicate down-regulation. Brown arrows indicate positive regulation, and  
627 brown Ts indicate negative regulation. **c** Mice were infected with CHIKV and colons were  
628 harvested on day 5 post infection for RNA-Seq analysis. The mean viremias are shown for the  
629 mice used in the +MP+CHIKV vs -MP+CHIKV RNA-Seq comparison for day 5 colon. **d** The  
630 full gene list for +MP+CHIKV vs -MP+CHIKV (Supplementary Table 2a) was interrogated  
631 using GSEAs and BTM and MSigDB gene sets (Supplementary Table 2c,d). Top BTM and  
632 selected MSigDB signatures are shown (Supplementary Table 2c,d, highlighted in yellow).

633  
634 **Figure 3. Analysis of RNA-Seq data from mesenteric lymph nodes.** **a** RNA-Seq was used to  
635 compare mesenteric lymph nodes (MLNs) from mice drinking MP (+MP) with MLNs from mice  
636 drinking water without MP (-MP) for 28 days. The full gene list (Supplementary Table 4a) was  
637 interrogated using GSEAs and gene sets from MSigDB (Supplementary Table 4b) (green text)  
638 and BTMs (Supplementary Table 4c) (blue text). **b** RNA-Seq was used to compare MLNs 9  
639 days after CHIKV infection for +MP+CHIKV vs -MP+CHIKV, with mice having their drinking  
640 water supplemented with or without MP for 37 days (i.e. 28 plus 9). DEGs (n=282) were  
641 identified (Supplementary Table 4f) and analysed by IPA (Supplementary Table 4g,h) and  
642 GSEAs (Supplementary Table 4i,j)

643  
644 **Figure 4. Infection and arthritis in +MP+CHIKV versus -MP+CHIKV**  
645 **a** Female C57BL/6J mice with drinking water supplemented with or without MP for 28 days  
646 were infected with CHIKV and foot swelling monitored. MP supplementation was continued  
647 until the end of the experiment. (n=24 feet from 12 mice day 0 to 5, n=16 feet from 8 mice from



648 days 6 to 9, and n=8 feet from 4 mice from day 10 to 19. Statistics by Mann Whitney U tests.  
649 Feet from 4 mice per group were harvested on day 9 for RNA-Seq (blue arrow). **b** The  
650 percentage of reads mapping to the CHIKV genome (n=4 feet from 4 mice per group) Statistics  
651 by t test. **c** IHC using an anti-F4/80 antibody. Statistics by Kruskal Wallis tests, n=4 feet from 4  
652 mice per group, 3 sections per foot to produce a mean for each foot. **d** IHC using an anti-Ly6G  
653 antibody. Statistics as in c except n=2 feet for +MP and -MP groups, so these were combined  
654 for statistical purposes. **e** The ratio of Ly6G/ F4/80 staining for each foot from 4 mice per group.  
655 Statistics by Kruskal Wallis test. **f** IHC using an anti-CD3. Statistics as in c. **g** IHC using an  
656 anti-NKp46 antibody. Statistics as in c.

657  
658 **Figure 5. Analysis of RNA-Seq data from feet day 9 post infection for +MP+CHIKV versus**  
659 **-MP+CHIKV.** RNA-Seq of feet, taken day 9 post infection, provided 460 DEGs ( $p < 0.01$ ) for  
660 +MP+CHIKV versus -MP+CHIKV (Supplementary Table 5b). These DEGs were analyzed by  
661 IPA and Cytoscape (Supplementary Table 5c-f) and the All gene list (Supplementary Table 5a),  
662 pre ranked by fold change, interrogated using GSEAs and gene lists from MSigDB and BTMs  
663 (Supplementary Table 5g,h). Top and other selected annotations are shown, highlighting the  
664 pathways known to be associated with promotion of arthritis.

665  
666 **Figure 6. No effect of MP consumption on the microbiome.** **a** Female C57BL/6J mice (n=48)  
667 were randomly assigned into four groups; each group comprised 12 mice housed in 4 cages. On  
668 day 0 two groups were given drinking water supplemented with MPs (+MP), with two groups  
669 left drinking unsupplemented water (-MP). On days 0 and 28 there were thus two replicate  
670 groups for +MP and two replicate groups for -MP (a total of n=24 mice and n=8 cages per  
671 group). On day 28, mice in one -MP and one +MP group were infected with CHIKV (-  
672 MP+CHIKV and +MP+CHIKV). On day 5 and 9 post CHIKV infection some mice were  
673 euthanized for histology and RNA-Seq. Fecal samples were taken from each (and each  
674 remaining) mouse at the indicated times and the microbiome determined by 16S sequencing and  
675 analyzed by Calypso, with the mean of all mice in each group shown. The genus levels output is  
676 shown. **b** On day 28 post onset of MP supplementation, all +MP versus all -MP mice were  
677 compared (n=24 mice and n=8 cages per group) by PCA analyses based on OTUs, with each  
678 plotted data point representing one mouse. The data is presented in two ways, +MP versus -MP  
679 (top) and by cage (bottom). **c** The Shannon indexes (based on OTUs) for all the mice in b plotted  
680 for +MP versus -MP (top) and by cage (bottom). Statistical comparison for +MP versus -MP by  
681 one way ANOVA,  $p = 0.51$ , F-statistic=0.45.

682  
683 **Figure 7. MP supplementation and the microbiome after CHIKV infection.** **a** The  
684 microbiome analyzed by Calypso and plotted at the phylum level for mice day 0 and 5 post  
685 CHIKV infection. The microbiome from this subset of mice were previously described at the  
686 genus level in Fig. 6a. Changes in the proportion of Firmicutes and Bacteroidetes, which reach  
687 significance in the -MP+CHIKV mice, but not the +MP+CHIKV mice (Supplemental Table 6b).  
688 **b** The fold changes in the Firmicutes/Bacteroidetes (F/B) ratios in individual mice from day 0 to  
689 the indicated day post-CHIKV infection. In both -MP+CHIKV and +MP+CHIKV groups, on  
690 day 5 a subset of mice showed a relatively higher increase in F/B ratios when compared to day 0

691 (green circles), whereas the remaining mice showed a relatively lower change (blue circles). **c**  
692 The mean viremias for the mice that on day 5 had relatively high increases in F/B ratios  
693 compared with those with low change in F/B ratios. Same mice as shown in b for day 5. The  
694 differences in viremia were significant on day 4; -MP+CHIKV, statistics by Kruskal-Wallis test  
695 (non-parametric data distribution), and +MP+CHIKV by t test (parametric data distribution). **d**  
696 Correlations of fecal Firmicutes and Bacteroidetes abundance on day 5 versus viremia on day 4  
697 for individual mice. Statistics, for -MP+CHIKV by Spearman correlations (non-parametric data  
698 distributions) for +MP+CHIKV by Pearson correlations (parametric data distributions). **e** PCAs  
699 illustrating that the groups identified as having a high increase (green circles) and a low change  
700 in F/B ratios (blue circles) have microbiomes that also clearly segregate at the OTU level on day  
701 5.

702

## 703 **RESOURCE AVAILABILITY**

704

### 705 **Lead contact**

706 Further information and requests for resources and reagents should be directed to the Lead  
707 Contact, Andreas Suhrbier (Andreas.Suhrbier@qimrberghofer.edu.au).

708

### 709 **Materials availability**

710 Materials generated in this study will be made available on request, but we may require a  
711 completed materials transfer agreement.

712

### 713 **Data and code availability**

714 All data is provided in the manuscript and accompanying supplementary files. Raw sequencing  
715 data (fastq files) generated for this publication for RNA-Seq and for the microbiome has been  
716 deposited in the NCBI SRA, BioProject: PRJNA753548 and are publicly available as of the date  
717 of publication.

718

## 719 **EXPERIMENTAL MODEL AND SUBJECT DETAILS**

720

### 721 **Ethics Statement and PC3/BSL3 certifications**

722 All mouse work was conducted in accordance with the “Australian code for the care and use of  
723 animals for scientific purposes” as defined by the National Health and Medical Research Council  
724 of Australia. Mouse work was approved by the QIMR Berghofer Medical Research Institute  
725 animal ethics committee (P2235 A1606-618M), with infectious CHIKV work conducted in a  
726 biosafety level3 (PC3) facility at the QIMR Berghofer MRI (Australian Department of  
727 Agriculture, Water and the Environment certification Q2326 and Office of the Gene Technology  
728 Regulator certification 3445).

729

### 730 **Mice and CHIKV infection**

731 Female C57BL/6J mice (6-8 weeks old) were purchased from Animal Resources Center  
732 (Canning Vale, WA, Australia). CHIKV infection was undertaken as described (Gardner et al.,  
733 2010; Nguyen et al., 2020; Poo et al., 2014b) with  $10^4$  CCID<sub>50</sub> C6/36-derived CHIKV (Reunion

734 Island isolate, LR2006-OPY1, GenBank: KT449801.1) inoculated subcutaneously (s.c.) into  
735 each hind foot. Virus was checked for mycoplasma as described (La Linn et al., 1995).

736 Swelling of hind feet was measured using digital calipers and is presented as a group average  
737 of the percentage increase in foot height  $\times$  width for each foot compared with the same foot on  
738 day 0 (Nguyen et al., 2020). Serum viremia was determined using CCID<sub>50</sub> assays of serum  
739 obtained by tail bleed as described (Gardner et al., 2010; Nguyen et al., 2020; Poo et al., 2014b).  
740 Intestine and feet tissue titers were determined by CCID<sub>50</sub> assays of supernatants of homogenized  
741 tissues as described (Gardner et al., 2010). Tissues were also placed into RNeasy Protect Tissue  
742 Reagent (QIAGEN) for RT-qPCR and/or RNA-Seq analyses.

743  
744 **Cell lines**  
745 Vero cells (ATCC#: CCL-81) and C6/36 cells (ATCC# CRL-1660) cell were maintained in  
746 RPMI 1640 (Thermo Fisher Scientific, Scoresby, VIC, Australia) supplemented with endotoxin  
747 free 10% heat-inactivated fetal bovine serum (FBS; Sigma-Aldrich, Castle Hill, NSW, Australia)  
748 at 37°C and 5% CO<sub>2</sub>. Cells were checked for mycoplasma using MycoAlert Mycoplasma  
749 Detection Kit (Lonza, Basel, Switzerland). FBS was checked for endotoxin contamination  
750 before purchase as described (Johnson et al., 2005).

## 751 752 **METHOD DETAILS**

753  
754 **Water supplementation with MPs**  
755 The MPs comprised Fluoresbrite® yellow-green polystyrene-based microspheres with a diameter  
756 of 1.00  $\mu$ m (Cat# 17154-10) purchased from Polysciences as 2.5% w/v in aqueous suspension  
757 without sodium azide. The 1  $\mu$ m microspheres were washed 3 times in 1 ml drinking water by  
758 centrifugation at 12,000  $\times$  g for 10 min, with the final wash including a 1 hr incubation on a rotor  
759 at 4°C. The MPs were diluted in mice drinking water to 10<sup>6</sup> microspheres/ml (526  $\mu$ g/l).  
760 Drinking water bottles containing MPs were inverted every 2-3 days, and fresh water  
761 with/without MP was provided every week. Mice were exposed to MP in their drinking water  
762 for 4 weeks prior to CHIKV infection, and thereafter until euthanasia.

763 For the water preference experiment, mice cages were fitted with 2 bottles of drinking water;  
764 one with and one without 1  $\mu$ m MPs. Water in drinking bottles was measured using standard  
765 scales.

766  
767 **MP detection in tissues and feces**  
768 Tissue and feces were weighted, manually chopped using scissors and digested in ammonium  
769 sulphate (50 mM), SDS (5 mg/ml) and proteinase K (1 mg/ml) overnight at 37°C as described  
770 (Walczak et al., 2015). Digested tissue suspensions were viewed by florescent microscope and a  
771 haemocytometer, with florescent MPs counted manually.

772  
773 **CCID<sub>50</sub> assays**  
774 Serum CCID<sub>50</sub> assays were conducted as described previously using 10 fold serial dilution in  
775 duplicate in C6/36 cells and virus followed by detection using cytopathic effects in Vero cells  
776 (Gardner et al., 2010; Nguyen et al., 2020). For tissue titer determinations, tissues were weighed  
777 and placed in tubes containing RPMI1640 supplemented with 2% FCS and 4 x 2.8 mm ceramic

778 beads (MO BIO Inc., Carlsbad, USA). Tissues were homogenized using Precellys24 Tissue  
779 Homogeniser (Bertin Technologies, Montigny-le-Bretonneux, France) 6000 x g for 15 seconds.  
780 After centrifugation twice at 21000 x g for 5 min titers in the supernatants were determined by  
781 CCID<sub>50</sub> assays (as above) using 5 or 10 fold serial dilutions. The virus titers were determined by  
782 the method of Spearman and Karber.

783

#### 784 **RT-qPCR**

785 Mice feet or intestine was transferred from RNaprotect Tissue Reagent (QIAGEN) to TRIzol  
786 (Life Technologies) and was homogenized as above twice at 6000 x g for 15 sec. Homogenates  
787 were centrifuged at 14,000 × g for 10 min and RNA was isolated as per manufacturer's  
788 instructions. cDNA was synthesized using iScript cDNA Synthesis Kit (Bio-Rad) and qPCR  
789 performed using iTaq Universal SYBR Green Supermix (Bio-Rad) as per manufacturer  
790 instructions with the following primers; CHIKV E1 (Poo et al., 2014b) Forward 5'-  
791 AGCTCCGCGTCCTTTACC -3' and Reverse 5'- CAAATTGTCCTGGTCTTCCTG -3',  
792 mRPL13a (Schroder et al., 2010) Forward 5'- GAGGTCGGGTGGAAGTACCA -3' and  
793 Reverse 5'- TGCATCTTGGCCTTTTCCTT -3'. Serially diluted sample was used to generate a  
794 standard curve for CHIKV and mRPL13a primers, and this was used to calculate a relative  
795 quantity. qPCR reactions were performed in duplicate and averaged to determine the relative  
796 quantity in each sample, and CHIKV was normalized to mRPL13a to give relative CHIKV RNA  
797 levels.

798

#### 799 **RNA-Seq and differential expression analyses**

800 TRIzol extracted RNA from mice feet, large intestine and mesenteric lymph nodes was treated  
801 with DNase (RNase-Free DNase Set (Qiagen)) followed by purification using RNeasy MinElute  
802 Cleanup Kit (QIAGEN) as per manufacturer instructions. RNA concentration and quality was  
803 measured using TapeStation D1K TapeScreen assay (Agilent). cDNA libraries were prepared  
804 using the Illumina TruSeq Stranded mRNA library prep kit and the sequencing performed on the  
805 Illumina Nextseq 550 platform generating 75 bp paired end reads. Per base sequence quality for  
806 >90% bases was above Q30 for all samples.

807 The quality of raw sequencing reads was assessed using FastQC (Simons, 2010)(v0.11.8) and  
808 trimmed using Cutadapt (Martin, 2011) (v2.3) to remove adapter sequences and low-quality  
809 bases. Trimmed reads were aligned using STAR (Dobin et al., 2013) (v2.7.1a) to a combined  
810 reference that included the mouse GRCm38 primary assembly and the GENCODE M23 gene  
811 model (Harrow et al., 2012) and CHIKV (GenBank KT449801.1, 11796 bp). Mouse gene  
812 expression was estimated using RSEM (Li and Dewey, 2011) (v1.3.0). Reads aligned to CHIKV  
813 were counted using SAMtools (Li et al., 2009) (v1.9). Differential gene expression in the mouse  
814 was analyzed using DESeq2 (v1.32.0) (Love et al., 2014) with default settings in R (v4.1.0),  
815 which employs Independent Filtering to remove genes with low expression values (Team, 2013).

816 Principle components analyses of log<sub>2</sub> normalized counts were performed using ggpubr  
817 (v0.4.0) in R. For the 281 differentially expressed colon genes, expression values were  
818 compared by plotting the log<sub>2</sub> ratio of normalized counts to row means in a heatmap that used  
819 Euclidean distance to cluster genes and samples, with the pheatmap package (v1.0.12) (Kolde,  
820 2015) in R.

821

## 822 **Pathway Analyses**

823 Up-Stream Regulators (USR), Diseases or Functions and Canonical pathways enriched in  
824 differentially expressed genes in direct and indirect interactions were investigated using  
825 Ingenuity Pathway Analysis (IPA) (QIAGEN).

826

## 827 **Functional Enrichment Analyses**

828 Enrichment for biological processes, molecular functions, KEGG pathways and other Gene  
829 Ontology categories in DEG lists was undertaken using the STRING functional enrichment  
830 analysis in Cytoscape (v3.7.2)(Shannon et al., 2003; Szklarczyk et al., 2019). Gene Ontology  
831 (Ashburner et al., 2000; Gene Ontology, 2021) was also used to interrogate gene lists.

832

## 833 **Gene Set Enrichment Analyses**

834 Preranked GSEA (Subramanian et al., 2005) was performed on a desktop application (GSEA  
835 v4.0.3) (Broad Institute, UCSanDiago) using the “GSEAPreranked” module. Differentially  
836 expressed “All gene” lists (after independent filtering in DESeq2), ranked by fold change, were  
837 interrogated for enrichment of gene sets from the complete Molecular Signatures Database  
838 (MSigDB) v7.2 gene set collection (31,120 gene sets) (msigdb.v7.2.symbols.gmt) and from  
839 Blood Transcription modules (BTMs)(Li et al., 2014).

840 We constructed gene sets for Innate Lymphoid Cells ILC1, ILC2 and ILC3 (Supplementary  
841 Table 7a) using a comprehensive series of references (Fang et al., 2020; Klose and Artis, 2020;  
842 McFarland et al., 2021; Panda and Colonna, 2019) and used these gene sets in GSEAs.

843

## 844 **Histology and immunohistochemistry**

845 Feet histology, immunohistochemistry and quantitation of stain were undertaken as previously  
846 described (Gardner et al., 2010; Poo et al., 2014a; Prow et al., 2019; Wilson et al., 2017).  
847 Briefly, feet were fixed in 10% formalin, decalcified with EDTA, embedded in paraffin and  
848 sections stained with hematoxylin and eosin (H&E; Sigma-Aldrich, Darmstadt, Germany). For  
849 immunohistochemistry, sections were stained with rabbit anti-CD3 (A0452; Dako, North  
850 Sydney, Australia), rat anti-F4/80 (ab6640; Abcam, Melbourne, Australia), goat anti-NKp46  
851 (R&D Systems, AF2225), or rat anti-Ly6G (ab2557 NMP-R14; Abcam, Cambridge, MA, USA).  
852 Signal was detected using MACH2 Rabbit alkaline phosphatase (for CD3), Rat on Mouse  
853 alkaline phosphatase (for F4/80 & Ly6G) or Goat on Rodent alkaline phosphatase (for NKp46)  
854 Polymer Detection kits with Warp Red Chromogen (alkaline phosphatase) (Biocare Medical,  
855 Pacheco, CA, USA) (for CD3, F4/80 and NKp46), or NovaRed Chromogen Kit (peroxidase)  
856 (Vector Laboratories, Burlingame, CA, USA) (for Ly6G). Slides were scanned using Aperio AT  
857 Turbo (Aperio, Vista, CA USA) and analyzed using Aperio ImageScope software (Leica  
858 Biosystems, Mt Waverley, Australia) (v10) and the Positive Pixel Count v9 algorithm.

859 Eosinophils were labelled with Akoya Opal 620 tyramide (Akoya Biosciences, Marlborough,  
860 MA, USA) (Acharya and Ackerman, 2014; Liu et al., 2006) and staining analyzed by Aperio FL  
861 slide scanner (Leica Biosystems) and Qupath v0.2.3. (Bankhead et al., 2017).

862 For colon, tissue was fixed in 10% formalin, embedded in paraffin and stained with Alcian  
863 blue pH 2.5/periodic acid-Schiff (AB/PAS) stain. Quantitation of cells stained dark blue/purple

864 (neutral mucins in goblet cells) was undertaken using Aperio Pixel count.

865

### 866 **16S RNA-Seq of mice feces**

867 Female C57BL/6J mice (n=48) were randomly placed in holding cages at QIMR Berghofer MRI  
868 animal facility (n=6 mice per cage) for 1 week and were fed standard chow and water (Parker et  
869 al., 2018). Mice were then reassigned to new experimental cages so that each experimental cage  
870 contained 3 mice (i.e. 50% of the standard mouse density of 6 mice per cage (Basson et al.,  
871 2020)), with each mouse taken from a different holding cage. After another week on the same  
872 chow and water, the cages were randomly allocated into four groups, each group comprising 12  
873 mice in 4 cages. Two groups were then started on MP-supplemented water. This strategy was  
874 adopted to minimize the influence of cage effects on the results of the microbiome analysis  
875 (Basson et al., 2020).

876 Fecal pellets were collected fresh from each mouse in a cage directly into a screw cap micro  
877 tube (Sarstedt) at the indicated times. Pellets were heated at 100°C for 5 min, and sent to  
878 Australian Genome Research Facility (AGRF) for RNA extraction and 16S sequencing using  
879 V3-V4 region primers (Forward 5'- CCTAYGGGRBGCASCAG -3' and Reverse 5'-  
880 GGACTACNNGGTATCTAAT -3'. Sequencing was performed on an Illumina MiSeq  
881 platform.

882

### 883 **16S bioinformatics**

884 The bioinformatics analysis involved demultiplexing, quality control, OTU clustering, and  
885 taxonomic classification. Paired-ends reads were assembled by aligning the forward and reverse  
886 reads using PEAR (version 0.9.5). Primers were identified and trimmed. Trimmed sequences  
887 were processed using Quantitative Insights into Microbial Ecology (QIIME 1.8.4), USEARCH  
888 (version 8.0.1623), and UPARSE software. Using USEARCH tools, sequences were quality  
889 filtered, full length duplicate sequences were removed and sorted by abundance. Singletons or  
890 unique reads in the data set were discarded. Sequences were clustered and chimeric sequences  
891 were filtered using the “rdp\_gold” database as a reference. To obtain the number of reads in  
892 each OTU, reads were mapped back to OTUs with a minimum identity of 97%. Taxonomy was  
893 assigned using QIIME. All samples passed quality control metrics.

894 Multivariate statistical analysis of the 16S data was performed using Calypso software (v  
895 8.84) (Zakrzewski et al., 2017) with a .biom mapping file and metadata files. Data was filtered  
896 by excluding taxa that had less than 0.01% relative abundance, followed by total sum  
897 normalization (TSS) combined with square root transformation (Hellinger transformation).

898

### 899 **QUANTIFICATION AND STATISTICAL ANALYSIS**

900 Statistical analyses of experimental data were performed using IBM SPSS Statistics for  
901 Windows, Version 19.0 (IBM Corp., Armonk, NY, USA). The t-test was used when the  
902 difference in variances was <4, skewness was >-2 and kurtosis was <2. Otherwise, the non-  
903 parametric Kolmogorov-Smirnov or Kruskal-Wallis tests were used.

904

### 905 **Supplementary Material**

906 The Supplementary Material for this article comprises Supplementary Figures (pdf) and

907 Supplementary Tables (xlsx).

908

## 909 REFERENCES

910

- 911 Abbasi, N., Long, T., Li, Y., Yee, B.A., Cho, B.S., Hernandez, J.E., Ma, E., Patel, P.R., Sahoo,  
912 D., Sayed, I.M., *et al.* (2020). DDX5 promotes oncogene C3 and FABP1 expressions and  
913 drives intestinal inflammation and tumorigenesis. *Life Sci Alliance* 3, e202000772.
- 914 Acharya, K.R., and Ackerman, S.J. (2014). Eosinophil granule proteins: form and function. *J*  
915 *Biol Chem* 289, 17406-17415.
- 916 Akanyange, S.N., Lyu, X., Zhao, X., Li, X., Zhang, Y., Crittenden, J.C., Anning, C., Chen, T.,  
917 Jiang, T., and Zhao, H. (2021). Does microplastic really represent a threat? A review of the  
918 atmospheric contamination sources and potential impacts. *Sci Total Environ* 777, 146020.
- 919 Amaral-Zettler, L.A., Zettler, E.R., and Mincer, T.J. (2020). Ecology of the plastisphere. *Nat Rev*  
920 *Microbiol* 18, 139-151.
- 921 Ammendolia, D.A., Bement, W.M., and Brumell, J.H. (2021). Plasma membrane integrity:  
922 implications for health and disease. *BMC Biol* 19, 71.
- 923 An, R., Wang, X., Yang, L., Zhang, J., Wang, N., Xu, F., Hou, Y., Zhang, H., and Zhang, L.  
924 (2021). Polystyrene microplastics cause granulosa cells apoptosis and fibrosis in ovary  
925 through oxidative stress in rats. *Toxicology* 449, 152665.
- 926 Ashburner, M., Ball, C.A., Blake, J.A., Botstein, D., Butler, H., Cherry, J.M., Davis, A.P.,  
927 Dolinski, K., Dwight, S.S., Eppig, J.T., *et al.* (2000). Gene ontology: tool for the unification of  
928 biology. The Gene Ontology Consortium. *Nat Genet* 25, 25-29.
- 929 Ashrafi, M., Kuhn, K.A., and Weisman, M.H. (2021). The arthritis connection to inflammatory  
930 bowel disease (IBD): why has it taken so long to understand it? *RMD Open* 7, e001558.
- 931 Banerjee, A., and Shelver, W.L. (2021). Micro- and nanoplastic induced cellular toxicity in  
932 mammals: A review. *Sci Total Environ* 755, 142518.
- 933 Bankhead, P., Loughrey, M.B., Fernandez, J.A., Dombrowski, Y., McArt, D.G., Dunne, P.D.,  
934 McQuaid, S., Gray, R.T., Murray, L.J., Coleman, H.G., *et al.* (2017). QuPath: Open source  
935 software for digital pathology image analysis. *Sci Rep* 7, 16878.
- 936 Basson, A.R., LaSalla, A., Lam, G., Kulpins, D., Moen, E.L., Sundrud, M.S., Miyoshi, J., Ilic, S.,  
937 Theriault, B.R., Cominelli, F., *et al.* (2020). Artificial microbiome heterogeneity spurs six  
938 practical action themes and examples to increase study power-driven reproducibility. *Sci Rep*  
939 *10*, 5039.
- 940 Benezech, C., and Jackson-Jones, L.H. (2019). ILC2 Orchestration of Local Immune Function in  
941 Adipose Tissue. *Front Immunol* 10, 171.
- 942 Bianchi, M.E., and Mezzapelle, R. (2020). The Chemokine Receptor CXCR4 in Cell  
943 Proliferation and Tissue Regeneration. *Front Immunol* 11, 2109.
- 944 Bilal, M., Mehmood, S., and Iqbal, H.M.N. (2020). The Beast of Beauty: Environmental and  
945 Health Concerns of Toxic Components in Cosmetics. *Cosmetics-Basel* 7, 13.
- 946 Böhmert, L., Stock, V., and Braeuning, A. (2019). Plausibility of microplastic uptake in a paper  
947 by Deng *et al.*, *Scientific reports* 7:46687, 2017. *Arch Toxicol* 93, 217-218.
- 948 Braeuning, A. (2019). Uptake of microplastics and related health effects: a critical discussion of  
949 Deng *et al.*, *Scientific reports* 7:46687, 2017. *Arch Toxicol* 93, 219-220.
- 950 Brailey, P.M., Lebrusant-Fernandez, M., and Barral, P. (2020). NKT cells and the regulation of  
951 intestinal immunity: a two-way street. *FEBS J* 287, 1686-1699.

- 952 Campanale, C., Massarelli, C., Savino, I., Locaputo, V., and Uricchio, V.F. (2020). A Detailed  
953 Review Study on Potential Effects of Microplastics and Additives of Concern on Human  
954 Health. *Int J Environ Res Public Health* 17, 1212.
- 955 Chen, R., Huang, Z., Wang, J., Chen, X., Fu, Y., and Wang, W. (2018). Silent Information  
956 Regulator 1 Negatively Regulates Atherosclerotic Angiogenesis via Mammalian Target of  
957 Rapamycin Complex 1 Signaling Pathway. *Am J Med Sci* 356, 168-176.
- 958 Chen, X., Li, L., Khan, M.N., Shi, L., Wang, Z., Zheng, F., Gong, F., and Fang, M. (2016).  
959 HMGB1 exacerbates experimental mouse colitis by enhancing innate lymphoid cells 3  
960 inflammatory responses via promoted IL-23 production. *Innate Immun* 22, 696-705.
- 961 Colombi, M., Molle, K.D., Benjamin, D., Rattenbacher-Kiser, K., Schaefer, C., Betz, C.,  
962 Thiemeyer, A., Regenass, U., Hall, M.N., and Moroni, C. (2011). Genome-wide shRNA  
963 screen reveals increased mitochondrial dependence upon mTORC2 addiction. *Oncogene* 30,  
964 1551-1565.
- 965 Cook, L.E., Locke, M.C., Young, A.R., Monte, K., Hedberg, M.L., Shimak, R.M., Sheehan,  
966 K.C.F., Veis, D.J., Diamond, M.S., and Lenschow, D.J. (2019). Distinct Roles of Interferon  
967 Alpha and Beta in Controlling Chikungunya Virus Replication and Modulating Neutrophil-  
968 Mediated Inflammation. *J Virol* 94, e00841.
- 969 Cox, K.D., Covernton, G.A., Davies, H.L., Dower, J.F., Juanes, F., and Dudas, S.E. (2019).  
970 Human Consumption of Microplastics. *Environ Sci Technol* 53, 7068-7074.
- 971 Dawson, A.L., Kawaguchi, S., King, C.K., Townsend, K.A., King, R., Huston, W.M., and  
972 Bengtson Nash, S.M. (2018). Turning microplastics into nanoplastics through digestive  
973 fragmentation by Antarctic krill. *Nat Commun* 9, 1001.
- 974 De Koker, S., Van Hoecke, L., De Beuckelaer, A., Roose, K., Deswarte, K., Willart, M.A.,  
975 Bogaert, P., Naessens, T., De Geest, B.G., Saelens, X., *et al.* (2017). Inflammatory monocytes  
976 regulate Th1 oriented immunity to CpG adjuvanted protein vaccines through production of IL-  
977 12. *Sci Rep* 7, 5986.
- 978 de la Cruz Lopez, K.G., Toledo Guzman, M.E., Sanchez, E.O., and Garcia Carranca, A. (2019).  
979 mTORC1 as a Regulator of Mitochondrial Functions and a Therapeutic Target in Cancer.  
980 *Front Oncol* 9, 1373.
- 981 de Lucia, A., and Ostanello, F. (2020). On-farm risk factors associated with Salmonella in pig  
982 herds. *Large Animal Review* 26, 133-140.
- 983 de Wit, W., and Bigaud, N. (2019). No plastic in nature: assessing plastic ingestion from nature  
984 to people (World Wildlife Fund).
- 985 Deng, Y., Yan, Z., Shen, R., Wang, M., Huang, Y., Ren, H., Zhang, Y., and Lemos, B. (2020).  
986 Microplastics release phthalate esters and cause aggravated adverse effects in the mouse gut.  
987 *Environ Int* 143, 105916.
- 988 Deng, Y., and Zhang, Y. (2019). Response to Uptake of microplastics and related health effects:  
989 a critical discussion of Deng et al., *Scientific reports* 7: 46687, 2017. *Arch Toxicol* 93, 213-  
990 215.
- 991 Deng, Y., Zhang, Y., Lemos, B., and Ren, H. (2017). Tissue accumulation of microplastics in  
992 mice and biomarker responses suggest widespread health risks of exposure. *Sci Rep* 7, 46687.
- 993 Deng, Y., Zhang, Y., Qiao, R., Bonilla, M.M., Yang, X., Ren, H., and Lemos, B. (2018).  
994 Evidence that microplastics aggravate the toxicity of organophosphorus flame retardants in  
995 mice (*Mus musculus*). *J Hazard Mater* 357, 348-354.



- 996 Dessi, C., Okoffo, E.D., O'Brien, J.W., Gallen, M., Samanipour, S., Kaserzon, S., Rauert, C.,  
997 Wang, X., and Thomas, K.V. (2021). Plastics contamination of store-bought rice. *J Hazard*  
998 *Mater* *416*, 125778.
- 999 Diefenbach, A., Gnafakis, S., and Shomrat, O. (2020). Innate Lymphoid Cell-Epithelial Cell  
1000 Modules Sustain Intestinal Homeostasis. *Immunity* *52*, 452-463.
- 1001 Diz-Munoz, A., Thurley, K., Chintamen, S., Altschuler, S.J., Wu, L.F., Fletcher, D.A., and  
1002 Weiner, O.D. (2016). Membrane Tension Acts Through PLD2 and mTORC2 to Limit Actin  
1003 Network Assembly During Neutrophil Migration. *PLoS Biol* *14*, e1002474.
- 1004 Dobin, A., Davis, C.A., Schlesinger, F., Drenkow, J., Zaleski, C., Jha, S., Batut, P., Chaisson, M.,  
1005 and Gingeras, T.R. (2013). STAR: ultrafast universal RNA-seq aligner. *Bioinformatics* *29*,  
1006 15-21.
- 1007 Eloranta, M.L., Sandberg, K., Ricciardi-Castagnoli, P., Lindahl, M., and Alm, G.V. (1997).  
1008 Production of interferon-alpha/beta by murine dendritic cell lines stimulated by virus and  
1009 bacteria. *Scand J Immunol* *46*, 235-241.
- 1010 Fackelmann, G., and Sommer, S. (2019). Microplastics and the gut microbiome: How  
1011 chronically exposed species may suffer from gut dysbiosis. *Mar Pollut Bull* *143*, 193-203.
- 1012 Fang, W., Zhang, Y., and Chen, Z. (2020). Innate lymphoid cells in inflammatory arthritis.  
1013 *Arthritis Res Ther* *22*, 25.
- 1014 Farisogullari, B., Yardimci, G.K., Sari, A., Bilgin, E., Bolek, E.C., Duran, E., Kilic, L., Akdogan,  
1015 A., Karadag, O., Apras Bilgen, S., *et al.* (2021). Is the impact of biologic agents in  
1016 enteropathic spondylitis different from other spondylitis? Real life data from the HUR-BIO  
1017 Registry. *Clin Exp Rheumatol.* (Online ahead of print).
- 1018 Felipe, V.L.J., Paula, A.V., and Silvio, U.I. (2020). Chikungunya virus infection induces  
1019 differential inflammatory and antiviral responses in human monocytes and monocyte-derived  
1020 macrophages. *Acta Trop* *211*, 105619.
- 1021 Fernando, N., Sciume, G., O'Shea, J.J., and Shih, H.Y. (2021). Multi-Dimensional Gene  
1022 Regulation in Innate and Adaptive Lymphocytes: A View From Regulomes. *Front Immunol*  
1023 *12*, 655590.
- 1024 Fine, R.L., Manfredo Vieira, S., Gilmore, M.S., and Kriegel, M.A. (2020). Mechanisms and  
1025 consequences of gut commensal translocation in chronic diseases. *Gut Microbes* *11*, 217-230.
- 1026 Franchina, D.G., Dostert, C., and Brenner, D. (2018). Reactive Oxygen Species: Involvement in  
1027 T Cell Signaling and Metabolism. *Trends Immunol* *39*, 489-502.
- 1028 Fu, W., and Hall, M.N. (2020). Regulation of mTORC2 Signaling. *Genes (Basel)* *11*, 1045.
- 1029 Galloway, A., Kaskar, A., Ditsova, D., Atrih, A., Yoshikawa, H., Gomez-Moreira, C., Suska, O.,  
1030 Warminski, M., Grzela, R., Lamond, A.I., *et al.* (2021). Upregulation of RNA cap  
1031 methyltransferase RNMT drives ribosome biogenesis during T cell activation. *Nucleic Acids*  
1032 *Res* *49*, 6722-6738.
- 1033 Gao, S., Yan, L., Wang, R., Li, J., Yong, J., Zhou, X., Wei, Y., Wu, X., Wang, X., Fan, X., *et al.*  
1034 (2018). Tracing the temporal-spatial transcriptome landscapes of the human fetal digestive  
1035 tract using single-cell RNA-sequencing. *Nat Cell Biol* *20*, 721-734.
- 1036 Gardner, J., Anraku, I., Le, T.T., Larcher, T., Major, L., Roques, P., Schroder, W.A., Higgs, S.,  
1037 and Suhrbier, A. (2010). Chikungunya virus arthritis in adult wild-type mice. *J Virol* *84*,  
1038 8021-8032.
- 1039 Garrido Gamarro, E., Ryder, J., Elvevoll, E.O., and Olsen, R.L. (2020). Microplastics in Fish and  
1040 Shellfish – A Threat to Seafood Safety? *J Aquat Food Prod Technol* *29*, 417-425.

- 1041 Gene Ontology, C. (2021). The Gene Ontology resource: enriching a GOld mine. *Nucleic Acids*  
1042 *Res* 49, D325-D334.
- 1043 Ghosh, H.S., McBurney, M., and Robbins, P.D. (2010). SIRT1 negatively regulates the  
1044 mammalian target of rapamycin. *PLoS One* 5, e9199.
- 1045 Graves, D.T., and Milovanova, T.N. (2019). Mucosal Immunity and the FOXO1 Transcription  
1046 Factors. *Front Immunol* 10, 2530.
- 1047 Gutiérrez-Gonzalez, L.A., Macias, E., Herrera-Vivas, F., Otaiza, F., Duran, J.C.G., and Veitia, G.  
1048 (2020). Biomarkers in Enteropathic Arthritis. *Ann Clin Gastroenterol Hepatol* 4, 039-044.
- 1049 Harrow, J., Frankish, A., Gonzalez, J.M., Tapanari, E., Diekhans, M., Kokocinski, F., Aken,  
1050 B.L., Barrell, D., Zadissa, A., Searle, S., *et al.* (2012). GENCODE: the reference human  
1051 genome annotation for The ENCODE Project. *Genome Res* 22, 1760-1774.
- 1052 Hazlewood, J.E., Dumenil, T., Le, T.T., Slonchak, A., Kazakoff, S.H., Patch, A.M., Gray, L.A.,  
1053 Howley, P.M., Liu, L., Hayball, J.D., *et al.* (2021). Injection site vaccinology of a recombinant  
1054 vaccinia-based vector reveals diverse innate immune signatures. *PLoS Pathog* 17, e1009215.
- 1055 Heimbucher, T., Qi, W., and Baumeister, R. (2020). TORC2-SGK-1 signaling integrates external  
1056 signals to regulate autophagic turnover of mitochondria via mtROS. *Autophagy* 16, 1154-  
1057 1156.
- 1058 Hernandez, L.M., Xu, E.G., Larsson, H.C.E., Tahara, R., Maisuria, V.B., and Tufenkji, N.  
1059 (2019). Plastic Teabags Release Billions of Microparticles and Nanoparticles into Tea.  
1060 *Environ Sci Technol* 53, 12300-12310.
- 1061 Hirt, N., and Body-Malapel, M. (2020). Immunotoxicity and intestinal effects of nano- and  
1062 microplastics: a review of the literature. Part Fibre Toxicol 17, 57.
- 1063 Hoibian, E., Florens, N., Koppe, L., Vidal, H., and Soulage, C.O. (2018). Distal Colon Motor  
1064 Dysfunction in Mice with Chronic Kidney Disease: Putative Role of Uremic Toxins. *Toxins*  
1065 (Basel) 10, 204.
- 1066 Hou, B., Wang, F., Liu, T., and Wang, Z. (2021). Reproductive toxicity of polystyrene  
1067 microplastics: In vivo experimental study on testicular toxicity in mice. *J Hazard Mater* 405,  
1068 124028.
- 1069 Huang, J., and Manning, B.D. (2008). The TSC1-TSC2 complex: a molecular switchboard  
1070 controlling cell growth. *Biochem J* 412, 179-190.
- 1071 Huang, J., Wang, M.D., Lenz, S., Gao, D., and Kaltenboeck, B. (1999). IL-12 administered  
1072 during *Chlamydia psittaci* lung infection in mice confers immediate and long-term protection  
1073 and reduces macrophage inflammatory protein-2 level and neutrophil infiltration in lung  
1074 tissue. *J Immunol* 162, 2217-2226.
- 1075 Huang, W., Yin, H., Yang, Y., Jin, L., Lu, G., and Dang, Z. (2021). Influence of the co-exposure  
1076 of microplastics and tetrabromobisphenol A on human gut: Simulation in vitro with human  
1077 cell Caco-2 and gut microbiota. *Sci Total Environ* 778, 146264.
- 1078 Ibrahim, Y.S., Tuan Anuar, S., Azmi, A.A., Wan Mohd Khalik, W.M.A., Lehata, S., Hamzah,  
1079 S.R., Ismail, D., Ma, Z.F., Dzulkarnaen, A., Zakaria, Z., *et al.* (2021). Detection of  
1080 microplastics in human colectomy specimens. *JGH Open* 5, 116-121.
- 1081 Ihara, S., Hirata, Y., and Koike, K. (2017). TGF-beta in inflammatory bowel disease: a key  
1082 regulator of immune cells, epithelium, and the intestinal microbiota. *J Gastroenterol* 52, 777-  
1083 787.
- 1084 Iijima, N., Mattei, L.M., and Iwasaki, A. (2011). Recruited inflammatory monocytes stimulate  
1085 antiviral Th1 immunity in infected tissue. *Proc Natl Acad Sci U S A* 108, 284-289.

- 1086 Issac, M.N., and Kandasubramanian, B. (2021). Effect of microplastics in water and aquatic  
1087 systems. *Environ Sci Pollut Res Int* 28, 19544-19562.
- 1088 Janssens, J.L., Diekema, N.W., Reitsma, J.C., and Linssen, J.P. (1995). Taste interaction of  
1089 styrene/ethylbenzene mixtures in an oil-in-water emulsion. *Food Addit Contam* 12, 203-209.
- 1090 Jarade, A., Di Santo, J.P., and Serafini, N. (2021). Group 3 innate lymphoid cells mediate host  
1091 defense against attaching and effacing pathogens. *Curr Opin Microbiol* 63, 83-91.
- 1092 Jin, H., Ma, T., Sha, X., Liu, Z., Zhou, Y., Meng, X., Chen, Y., Han, X., and Ding, J. (2021a).  
1093 Polystyrene microplastics induced male reproductive toxicity in mice. *J Hazard Mater* 401,  
1094 123430.
- 1095 Jin, M., Wang, X., Ren, T., Wang, J., and Shan, J. (2021b). Microplastics contamination in food  
1096 and beverages: Direct exposure to humans. *J Food Sci* 86, 2816-2837.
- 1097 Jin, Y., Lu, L., Tu, W., Luo, T., and Fu, Z. (2019). Impacts of polystyrene microplastic on the gut  
1098 barrier, microbiota and metabolism of mice. *Sci Total Environ* 649, 308-317.
- 1099 Johnson, B.J., Le, T.T., Dobbin, C.A., Banovic, T., Howard, C.B., Flores Fde, M., Vanags, D.,  
1100 Naylor, D.J., Hill, G.R., and Suhrbier, A. (2005). Heat shock protein 10 inhibits  
1101 lipopolysaccharide-induced inflammatory mediator production. *J Biol Chem* 280, 4037-4047.
- 1102 Jung, I.D., Noh, K.T., Lee, C.M., Chun, S.H., Jeong, S.K., Park, J.W., Park, W.S., Kim, H.W.,  
1103 Yun, C.H., Shin, Y.K., *et al.* (2010). Oncostatin M induces dendritic cell maturation and Th1  
1104 polarization. *Biochem Biophys Res Commun* 394, 272-278.
- 1105 Karadima, V., Balli, T., Tyrnenopoulou, P., and Diakakis, N. (2021). Sand colic: A retrospective  
1106 study of 6 cases. *J Hell Vet Med Soc* 72, 2843-2850.
- 1107 Katan, M., and Cockcroft, S. (2020). Phosphatidylinositol(4,5)bisphosphate: diverse functions at  
1108 the plasma membrane. *Essays Biochem* 64, 513-531.
- 1109 Kessel, C., Lavric, M., Weinlage, T., Brueckner, M., de Roock, S., Dabritz, J., Weber, J.,  
1110 Vastert, S.J., and Foell, D. (2021). Serum biomarkers confirming stable remission in  
1111 inflammatory bowel disease. *Sci Rep* 11, 6690.
- 1112 Kim, J.J., and Khan, W.I. (2013). Goblet cells and mucins: role in innate defense in enteric  
1113 infections. *Pathogens* 2, 55-70.
- 1114 Kinder, J.M., Then, J.E., Hansel, P.M., Molinero, L.L., and Bruns, H.A. (2014). Long-term  
1115 repeated daily use of intragastric gavage hinders induction of oral tolerance to ovalbumin in  
1116 mice. *Comp Med* 64, 369-376.
- 1117 Klose, C.S.N., and Artis, D. (2020). Innate lymphoid cells control signaling circuits to regulate  
1118 tissue-specific immunity. *Cell Res* 30, 475-491.
- 1119 Kolde, R. (2015). pheatmap: Pretty heatmaps [Software]. URL [https://CRAN R-project](https://CRAN.R-project.org/package=pheatmap)  
1120 [org/package= pheatmap](https://CRAN.R-project.org/package=pheatmap).
- 1121 Kozłowska, J., Prus, W., and Stachowiak, N. (2019). Microparticles based on natural and  
1122 synthetic polymers for cosmetic applications. *Int J Biol Macromol* 129, 952-956.
- 1123 Kwak, M.S., Kim, H.S., Lee, B., Kim, Y.H., Son, M., and Shin, J.S. (2020). Immunological  
1124 Significance of HMGB1 Post-Translational Modification and Redox Biology. *Front Immunol*  
1125 11, 1189.
- 1126 La Linn, M., Bellett, A.J., Parsons, P.G., and Suhrbier, A. (1995). Complete removal of  
1127 mycoplasma from viral preparations using solvent extraction. *J Virol Methods* 52, 51-54.
- 1128 Labadie, K., Larcher, T., Joubert, C., Mannioui, A., Delache, B., Brochard, P., Guigand, L.,  
1129 Dubreil, L., Lebon, P., Verrier, B., *et al.* (2010). Chikungunya disease in nonhuman primates  
1130 involves long-term viral persistence in macrophages. *J Clin Invest* 120, 894-906.

- 1131 Lau, W.W.Y., Shiran, Y., Bailey, R.M., Cook, E., Stuchtey, M.R., Koskella, J., Velis, C.A.,  
1132 Godfrey, L., Boucher, J., Murphy, M.B., *et al.* (2020). Evaluating scenarios toward zero  
1133 plastic pollution. *Science* 369, 1455-1461.
- 1134 Le Roux, A.L., Quiroga, X., Walani, N., Arroyo, M., and Roca-Cusachs, P. (2019). The plasma  
1135 membrane as a mechanochemical transducer. *Philos Trans R Soc Lond B Biol Sci* 374,  
1136 20180221.
- 1137 Li, B., and Dewey, C.N. (2011). RSEM: accurate transcript quantification from RNA-Seq data  
1138 with or without a reference genome. *BMC Bioinformatics* 12, 323.
- 1139 Li, B., Ding, Y., Cheng, X., Sheng, D., Xu, Z., Rong, Q., Wu, Y., Zhao, H., Ji, X., and Zhang, Y.  
1140 (2020a). Polyethylene microplastics affect the distribution of gut microbiota and inflammation  
1141 development in mice. *Chemosphere* 244, 125492.
- 1142 Li, D., Shi, Y., Yang, L., Xiao, L., Kehoe, D.K., Gun'ko, Y.K., Boland, J.J., and Wang, J.J.  
1143 (2020b). Microplastic release from the degradation of polypropylene feeding bottles during  
1144 infant formula preparation. *Nature Food* 1, 746-754.
- 1145 Li, G., Liang, X., and Lotze, M.T. (2013). HMGB1: The Central Cytokine for All Lymphoid  
1146 Cells. *Front Immunol* 4, 68.
- 1147 Li, H., Handsaker, B., Wysoker, A., Fennell, T., Ruan, J., Homer, N., Marth, G., Abecasis, G.,  
1148 and Durbin, R. (2009). The Sequence Alignment/Map format and SAMtools. *Bioinformatics*  
1149 25, 2078-2079.
- 1150 Li, S., Roupheal, N., Duraisingham, S., Romero-Steiner, S., Presnell, S., Davis, C., Schmidt,  
1151 D.S., Johnson, S.E., Milton, A., Rajam, G., *et al.* (2014). Molecular signatures of antibody  
1152 responses derived from a systems biology study of five human vaccines. *Nat Immunol* 15,  
1153 195-204.
- 1154 Li, X., Miao, Y., Pal, D.S., and Devreotes, P.N. (2020c). Excitable networks controlling cell  
1155 migration during development and disease. *Semin Cell Dev Biol* 100, 133-142.
- 1156 Lim, X. (2021). Microplastics are everywhere - but are they harmful? *Nature* 593, 22-25.
- 1157 Lin, T., Geng, T., Harrison, A.G., Yang, D., Vella, A.T., Fikrig, E., and Wang, P. (2020).  
1158 CXCL10 Signaling Contributes to the Pathogenesis of Arthritogenic Alphaviruses. *Viruses*  
1159 12, 1252.
- 1160 Liu, G., Amin, S., Okuhama, N.N., Liao, G., and Mingle, L.A. (2006). A quantitative evaluation  
1161 of peroxidase inhibitors for tyramide signal amplification mediated cytochemistry and  
1162 histochemistry. *Histochem Cell Biol* 126, 283-291.
- 1163 Liu, R.M., and Desai, L.P. (2015). Reciprocal regulation of TGF-beta and reactive oxygen  
1164 species: A perverse cycle for fibrosis. *Redox Biol* 6, 565-577.
- 1165 Love, M.I., Huber, W., and Anders, S. (2014). Moderated estimation of fold change and  
1166 dispersion for RNA-seq data with DESeq2. *Genome Biol* 15, 550.
- 1167 Lu, L., Wan, Z., Luo, T., Fu, Z., and Jin, Y. (2018). Polystyrene microplastics induce gut  
1168 microbiota dysbiosis and hepatic lipid metabolism disorder in mice. *Sci Total Environ* 631-  
1169 632, 449-458.
- 1170 Luo, T., Wang, C., Pan, Z., Jin, C., Fu, Z., and Jin, Y. (2019a). Maternal Polystyrene  
1171 Microplastic Exposure during Gestation and Lactation Altered Metabolic Homeostasis in the  
1172 Dams and Their F1 and F2 Offspring. *Environ Sci Technol* 53, 10978-10992.
- 1173 Luo, T., Zhang, Y., Wang, C., Wang, X., Zhou, J., Shen, M., Zhao, Y., Fu, Z., and Jin, Y.  
1174 (2019b). Maternal exposure to different sizes of polystyrene microplastics during gestation  
1175 causes metabolic disorders in their offspring. *Environ Pollut* 255, 113122.

- 1176 Maleki, A., Khanmiri, J.M., Abadi, M.K.E., Soveyzi, F., Moazzami, B., Hamblin, M.R., and  
1177 Rezaei, N. (2020). Innate lymphoid cell subsets and their cytokines in autoimmune diseases.  
1178 *Eur Cytokine Netw* *31*, 118-128.
- 1179 Malerba, M., Ricciardolo, F., Radaeli, A., Torregiani, C., Ceriani, L., Mori, E., Bontempelli, M.,  
1180 Tantucci, C., and Grassi, V. (2006). Neutrophilic inflammation and IL-8 levels in induced  
1181 sputum of alpha-1-antitrypsin PiMZ subjects. *Thorax* *61*, 129-133.
- 1182 Mandal, R.S., Saha, S., and Das, S. (2015). Metagenomic surveys of gut microbiota. *Genomics*  
1183 *Proteomics Bioinformatics* *13*, 148-158.
- 1184 Martin, M. (2011). Cutadapt removes adapter sequences from high-throughput sequencing reads.  
1185 *2011* *17*, 3.
- 1186 Martinez Gomez, J.M., Chen, L., Schwarz, H., and Karrasch, T. (2013). CD137 facilitates the  
1187 resolution of acute DSS-induced colonic inflammation in mice. *PLoS One* *8*, e73277.
- 1188 McFarland, A.P., Yalin, A., Wang, S.Y., Cortez, V.S., Landsberger, T., Sudan, R., Peng, V.,  
1189 Miller, H.L., Ricci, B., David, E., *et al.* (2021). Multi-tissue single-cell analysis deconstructs  
1190 the complex programs of mouse natural killer and type 1 innate lymphoid cells in tissues and  
1191 circulation. *Immunity* *54*, 1320-1337 e1324.
- 1192 McKarns, S.C., Hansch, C., Caldwell, W.S., Morgan, W.T., Moore, S.K., and Doolittle, D.J.  
1193 (1997). Correlation between hydrophobicity of short-chain aliphatic alcohols and their ability  
1194 to alter plasma membrane integrity. *Fundam Appl Toxicol* *36*, 62-70.
- 1195 Miao, L., Wang, P., Hou, J., Yao, Y., Liu, Z., Liu, S., and Li, T. (2019). Distinct community  
1196 structure and microbial functions of biofilms colonizing microplastics. *Sci Total Environ* *650*,  
1197 2395-2402.
- 1198 Mohamed Nor, N.H., Kooi, M., Diepens, N.J., and Koelmans, A.A. (2021). Lifetime  
1199 Accumulation of Microplastic in Children and Adults. *Environ Sci Technol* *55*, 5084-5096.
- 1200 Morigasaki, S., Chin, L.C., Hatano, T., Emori, M., Iwamoto, M., Tatebe, H., and Shiozaki, K.  
1201 (2019). Modulation of TOR complex 2 signaling by the stress-activated MAPK pathway in  
1202 fission yeast. *J Cell Sci* *132*, 236133.
- 1203 Murphy, M.P., and Siegel, R.M. (2013). Mitochondrial ROS fire up T cell activation. *Immunity*  
1204 *38*, 201-202.
- 1205 Naderali, E., Khaki, A.A., Rad, J.S., Ali-Hemmati, A., Rahmati, M., and Charoudeh, H.N.  
1206 (2018). Regulation and modulation of PTEN activity. *Mol Biol Rep* *45*, 2869-2881.
- 1207 Nakaya, H.I., Gardner, J., Poo, Y.S., Major, L., Pulendran, B., and Suhrbier, A. (2012). Gene  
1208 profiling of Chikungunya virus arthritis in a mouse model reveals significant overlap with  
1209 rheumatoid arthritis. *Arthritis Rheum* *64*, 3553-3563.
- 1210 Napper, I.E., Davies, B.F.R., Clifford, H., Elvin, S., Koldewey, H.J., Mayewski, P.A., Miner,  
1211 K.R., Potocki, M., Elmore, A.C., Gajurel, A.P., *et al.* (2020). Reaching New Heights in Plastic  
1212 Pollution-Preliminary Findings of Microplastics on Mount Everest. *One Earth* *3*, 621-630.
- 1213 Neerinx, B., Elewaut, D., and Lories, R.J. (2015). Spreading spondyloarthritis: are ILCs  
1214 cytokine shuttles from base camp gut? *Ann Rheum Dis* *74*, 1633-1635.
- 1215 Nguyen, W., Nakayama, E., Yan, K., Tang, B., Le, T.T., Liu, L., Cooper, T.H., Hayball, J.D.,  
1216 Faddy, H.M., Warrilow, D., *et al.* (2020). Arthritogenic Alphavirus Vaccines: Serogrouping  
1217 Versus Cross-Protection in Mouse Models. *Vaccines (Basel)* *8*.
- 1218 Ogbourne, S.M., Suhrbier, A., Jones, B., Cozzi, S.J., Boyle, G.M., Morris, M., McAlpine, D.,  
1219 Johns, J., Scott, T.M., Sutherland, K.P., *et al.* (2004). Antitumor activity of 3-ingenyl  
1220 angelate: plasma membrane and mitochondrial disruption and necrotic cell death. *Cancer Res*  
1221 *64*, 2833-2839.

- 1222 Ogonowski, M., Motiei, A., Ininbergs, K., Hell, E., Gerdes, Z., Udekwu, K.I., Bacsik, Z., and  
1223 Gorokhova, E. (2018). Evidence for selective bacterial community structuring on  
1224 microplastics. *Environ Microbiol* 20, 2796-2808.
- 1225 Oh, M.H., Collins, S.L., Sun, I.H., Tam, A.J., Patel, C.H., Arwood, M.L., Chan-Li, Y., Powell,  
1226 J.D., and Horton, M.R. (2017). mTORC2 Signaling Selectively Regulates the Generation and  
1227 Function of Tissue-Resident Peritoneal Macrophages. *Cell Rep* 20, 2439-2454.
- 1228 Panda, S.K., and Colonna, M. (2019). Innate Lymphoid Cells in Mucosal Immunity. *Front*  
1229 *Immunol* 10, 861.
- 1230 Park, E.J., Han, J.S., Park, E.J., Seong, E., Lee, G.H., Kim, D.W., Son, H.Y., Han, H.Y., and Lee,  
1231 B.S. (2020). Repeated-oral dose toxicity of polyethylene microplastics and the possible  
1232 implications on reproduction and development of the next generation. *Toxicol Lett* 324, 75-  
1233 85.
- 1234 Parker, K.D., Albeke, S.E., Gigley, J.P., Goldstein, A.M., and Ward, N.L. (2018). Microbiome  
1235 Composition in Both Wild-Type and Disease Model Mice Is Heavily Influenced by Mouse  
1236 Facility. *Front Microbiol* 9, 1598.
- 1237 Pawlaczyk, K., Polubinska, A., Numata, N., Nakayama, M., Pecoits-Filho, R., Czekalski, S.,  
1238 Lindholm, B., and Breborowicz, A. (2008). Vascular endothelial growth factor in dialysate in  
1239 relation to intensity of peritoneal inflammation. *Int J Artif Organs* 31, 535-544.
- 1240 Peterson, L.W., and Artis, D. (2014). Intestinal epithelial cells: regulators of barrier function and  
1241 immune homeostasis. *Nat Rev Immunol* 14, 141-153.
- 1242 Petibon, C., Malik Ghulam, M., Catala, M., and Abou Elela, S. (2021). Regulation of ribosomal  
1243 protein genes: An ordered anarchy. *Wiley Interdiscip Rev RNA* 12, e1632.
- 1244 Pham, D.N., Clark, L., and Li, M. (2021). Microplastics as hubs enriching antibiotic-resistant  
1245 bacteria and pathogens in municipal activated sludge. *J Hazardous Mater* 2, 100014.
- 1246 Picchianti-Diamanti, A., Lorenzetti, R., Chimenti, M.S., Luchetti, M.M., Conigliaro, P.,  
1247 Canofari, C., Benfaremo, D., Bruzzese, V., Lagana, B., Perricone, R., *et al.* (2020).  
1248 Enteropathic spondyloarthritis: Results from a large nationwide database analysis.  
1249 *Autoimmun Rev* 19, 102457.
- 1250 Poo, Y.S., Nakaya, H., Gardner, J., Larcher, T., Schroder, W.A., Le, T.T., Major, L.D., and  
1251 Suhrbier, A. (2014a). CCR2 deficiency promotes exacerbated chronic erosive neutrophil-  
1252 dominated chikungunya virus arthritis. *J Virol* 88, 6862-6872.
- 1253 Poo, Y.S., Rudd, P.A., Gardner, J., Wilson, J.A., Larcher, T., Colle, M.A., Le, T.T., Nakaya, H.I.,  
1254 Warrilow, D., Allcock, R., *et al.* (2014b). Multiple immune factors are involved in controlling  
1255 acute and chronic chikungunya virus infection. *PLoS Negl Trop Dis* 8, e3354.
- 1256 Prow, N.A., Hirata, T.D.C., Tang, B., Larcher, T., Mukhopadhyay, P., Alves, T.L., Le, T.T.,  
1257 Gardner, J., Poo, Y.S., Nakayama, E., *et al.* (2019). Exacerbation of Chikungunya Virus  
1258 Rheumatic Immunopathology by a High Fiber Diet and Butyrate. *Front Immunol* 10, 2736.
- 1259 Prow, N.A., Tang, B., Gardner, J., Le, T.T., Taylor, A., Poo, Y.S., Nakayama, E., Hirata, T.D.C.,  
1260 Nakaya, H.I., Slonchak, A., *et al.* (2017). Lower temperatures reduce type I interferon activity  
1261 and promote alphaviral arthritis. *PLoS Pathog* 13, e1006788.
- 1262 Ranjan, V.P., Joseph, A., and Goel, S. (2021). Microplastics and other harmful substances  
1263 released from disposable paper cups into hot water. *J Hazard Mater* 404, 124118.
- 1264 Ribet, D., and Cossart, P. (2015). How bacterial pathogens colonize their hosts and invade deeper  
1265 tissues. *Microbes Infect* 17, 173-183.
- 1266 Riggi, M., Kusmider, B., and Loewith, R. (2020). The flipside of the TOR coin - TORC2 and  
1267 plasma membrane homeostasis at a glance. *J Cell Sci* 133, 242040.

- 1268 Romero, S., Le Clainche, C., and Gautreau, A.M. (2020). Actin polymerization downstream of  
1269 integrins: signaling pathways and mechanotransduction. *Biochem J* 477, 1-21.
- 1270 Sagawa, H., Tazuma, S., and Kajiyama, G. (1993). Protection against hydrophobic bile salt-  
1271 induced cell membrane damage by liposomes and hydrophilic bile salts. *Am J Physiol* 264,  
1272 G835-839.
- 1273 Sato, T., Ishii, J., Ota, Y., Sasaki, E., Shibagaki, Y., and Hattori, S. (2016). Mammalian target of  
1274 rapamycin (mTOR) complex 2 regulates filamin A-dependent focal adhesion dynamics and  
1275 cell migration. *Genes Cells* 21, 579-593.
- 1276 Schroder, W.A., Hirata, T.D., Le, T.T., Gardner, J., Boyle, G.M., Ellis, J., Nakayama, E.,  
1277 Pathirana, D., Nakaya, H.I., and Suhrbier, A. (2019). SerpinB2 inhibits migration and  
1278 promotes a resolution phase signature in large peritoneal macrophages. *Sci Rep* 9, 12421.
- 1279 Schroder, W.A., Le, T.T., Major, L., Street, S., Gardner, J., Lambley, E., Markey, K.,  
1280 MacDonald, K.P., Fish, R.J., Thomas, R., *et al.* (2010). A physiological function of  
1281 inflammation-associated SerpinB2 is regulation of adaptive immunity. *J Immunol* 184, 2663-  
1282 2670.
- 1283 Schultz, M.A., Hagan, S.S., Datta, A., Zhang, Y., Freeman, M.L., Sikka, S.C., Abdel-Mageed,  
1284 A.B., and Mondal, D. (2014). Nrf1 and Nrf2 transcription factors regulate androgen receptor  
1285 transactivation in prostate cancer cells. *PLoS One* 9, e87204.
- 1286 Schwabl, P., Koppel, S., Konigshofer, P., Bucsics, T., Trauner, M., Reiberger, T., and Liebmann,  
1287 B. (2019). Detection of Various Microplastics in Human Stool: A Prospective Case Series.  
1288 *Ann Intern Med* 171, 453-457.
- 1289 Senathirajah, K., Attwood, S., Bhagwat, G., Carbery, M., Wilson, S., and Palanisami, T. (2021).  
1290 Estimation of the mass of microplastics ingested - A pivotal first step towards human health  
1291 risk assessment. *J Hazard Mater* 404, 124004.
- 1292 Shannon, J.P., Vrba, S.M., Reynoso, G.V., Wynne-Jones, E., Kamenyeva, O., Malo, C.S.,  
1293 Cherry, C.R., McManus, D.T., and Hickman, H.D. (2021). Group 1 innate lymphoid-cell-  
1294 derived interferon-gamma maintains anti-viral vigilance in the mucosal epithelium. *Immunity*  
1295 54, 276-290 e275.
- 1296 Shannon, P., Markiel, A., Ozier, O., Baliga, N.S., Wang, J.T., Ramage, D., Amin, N.,  
1297 Schwikowski, B., and Ideker, T. (2003). Cytoscape: a software environment for integrated  
1298 models of biomolecular interaction networks. *Genome Res* 13, 2498-2504.
- 1299 Shyer, J.A., Flavell, R.A., and Bailis, W. (2020). Metabolic signaling in T cells. *Cell Res* 30,  
1300 649-659.
- 1301 Simons, A. (2010). A quality control tool for high throughput sequence data. Available online:  
1302 <https://www.bioinformatics.babraham.ac.uk/projects/fastqc>.
- 1303 Singer, M., and Sansonetti, P.J. (2004). IL-8 is a key chemokine regulating neutrophil  
1304 recruitment in a new mouse model of Shigella-induced colitis. *J Immunol* 173, 4197-4206.
- 1305 Sobhani, Z., Lei, Y., Tang, Y., Wu, L., Zhang, X., Naidu, R., Megharaj, M., and Fang, C. (2020).  
1306 Microplastics generated when opening plastic packaging. *Sci Rep* 10, 4841.
- 1307 Soehnlein, O., and Lindbom, L. (2010). Phagocyte partnership during the onset and resolution of  
1308 inflammation. *Nat Rev Immunol* 10, 427-439.
- 1309 Somasundaram, R., Nuij, V.J., van der Woude, C.J., Kuipers, E.J., Peppelenbosch, M.P., and  
1310 Fuhler, G.M. (2013). Peripheral neutrophil functions and cell signalling in Crohn`s disease.  
1311 *PLoS One* 8, e84521.
- 1312 Son, M., Diamond, B., and Shin, J.S. (2020). Editorial: The Role of HMGB1 in Immunity. *Front*  
1313 *Immunol* 11, 594253.

- 1314 Stenman, L.K., Holma, R., Forsgard, R., Gylling, H., and Korpela, R. (2013). Higher fecal bile  
1315 acid hydrophobicity is associated with exacerbation of dextran sodium sulfate colitis in mice.  
1316 *J Nutr* 143, 1691-1697.
- 1317 Stock, V., Böhmert, L., Lisicki, E., Block, R., Cara-Carmona, J., Pack, L.K., Selb, R.,  
1318 Lichtenstein, D., Voss, L., Henderson, C.J., *et al.* (2019). Uptake and effects of orally ingested  
1319 polystyrene microplastic particles in vitro and in vivo. *Arch Toxicol* 93, 1817-1833.
- 1320 Stojanov, S., Berlec, A., and Strukelj, B. (2020). The Influence of Probiotics on the  
1321 Firmicutes/Bacteroidetes Ratio in the Treatment of Obesity and Inflammatory Bowel disease.  
1322 *Microorganisms* 8, 1715.
- 1323 Subramanian, A., Tamayo, P., Mootha, V.K., Mukherjee, S., Ebert, B.L., Gillette, M.A.,  
1324 Paulovich, A., Pomeroy, S.L., Golub, T.R., Lander, E.S., *et al.* (2005). Gene set enrichment  
1325 analysis: a knowledge-based approach for interpreting genome-wide expression profiles. *Proc*  
1326 *Natl Acad Sci U S A* 102, 15545-15550.
- 1327 Suhrbier, A. (2019). Rheumatic manifestations of chikungunya: emerging concepts and  
1328 interventions. *Nat Rev Rheumatol* 15, 597-611.
- 1329 Suhrbier, A., Jaffar-Bandjee, M.C., and Gasque, P. (2012). Arthritogenic alphaviruses--an  
1330 overview. *Nat Rev Rheumatol* 8, 420-429.
- 1331 Szklarczyk, D., Gable, A.L., Lyon, D., Junge, A., Wyder, S., Huerta-Cepas, J., Simonovic, M.,  
1332 Doncheva, N.T., Morris, J.H., Bork, P., *et al.* (2019). STRING v11: protein-protein  
1333 association networks with increased coverage, supporting functional discovery in genome-  
1334 wide experimental datasets. *Nucleic Acids Res* 47, D607-D613.
- 1335 Takada, I., Yogiashi, Y., and Makishima, M. (2016). The ribosomal S6 kinase inhibitor BI-  
1336 D1870 ameliorated experimental autoimmune encephalomyelitis in mice. *Immunobiology*  
1337 221, 188-192.
- 1338 Tan, T.C.J., Knight, J., Sbarato, T., Dudek, K., Willis, A.E., and Zamoyska, R. (2017).  
1339 Suboptimal T-cell receptor signaling compromises protein translation, ribosome biogenesis,  
1340 and proliferation of mouse CD8 T cells. *Proc Natl Acad Sci U S A* 114, E6117-E6126.
- 1341 Tat, J., Heskett, K., Satomi, S., Pilz, R.B., Golomb, B.A., and Boss, G.R. (2021). Sodium azide  
1342 poisoning: a narrative review. *Clin Toxicol (Phila)* 59, 683-697.
- 1343 Team, R.C. (2013). R: A language and environment for statistical computing.
- 1344 Teo, T.H., Her, Z., Tan, J.J., Lum, F.M., Lee, W.W., Chan, Y.H., Ong, R.Y., Kam, Y.W.,  
1345 Leparc-Goffart, I., Gallian, P., *et al.* (2015). Caribbean and La Reunion Chikungunya Virus  
1346 Isolates Differ in Their Capacity To Induce Proinflammatory Th1 and NK Cell Responses and  
1347 Acute Joint Pathology. *J Virol* 89, 7955-7969.
- 1348 Tsai, Y.F., Yang, S.C., and Hwang, T.L. (2016). Formyl peptide receptor modulators: a patent  
1349 review and potential applications for inflammatory diseases (2012-2015). *Expert Opin Ther*  
1350 *Pat* 26, 1139-1156.
- 1351 van Raamsdonk, L.W.D., van der Zande, M., Koelmans, A.A., Hoogenboom, R., Peters, R.J.B.,  
1352 Groot, M.J., Peijnenburg, A., and Weesepeel, Y.J.A. (2020). Current Insights into Monitoring,  
1353 Bioaccumulation, and Potential Health Effects of Microplastics Present in the Food Chain.  
1354 *Foods* 9, 72.
- 1355 Verstockt, S., Verstockt, B., Machiels, K., Vancamelbeke, M., Ferrante, M., Cleynen, I., De  
1356 Hertogh, G., and Vermeire, S. (2021). Oncostatin M Is a Biomarker of Diagnosis, Worse  
1357 Disease Prognosis, and Therapeutic Nonresponse in Inflammatory Bowel Disease. *Inflamm*  
1358 *Bowel Dis.* (Online ahead of print).
- 1359 Vethaak, A.D., and Legler, J. (2021). Microplastics and human health. *Science* 371, 672-674.



- 1360 Villberg, K., Veijanen, A., and Gustafsson, I. (2004). Identification of off-flavor compounds in  
1361 high-density polyethylene (HDPE) with different amounts of absents. *Polymer Eng Sci* 38,  
1362 922-925.
- 1363 Villberg, K., Veijanen, A., Gustafsson, I., and Wickstrom, K. (1997). Analysis of odour and taste  
1364 problems in high-density polyethene. *J Chromatogr A* 791, 213-219.
- 1365 Vivier, E., Artis, D., Colonna, M., Diefenbach, A., Di Santo, J.P., Eberl, G., Koyasu, S.,  
1366 Locksley, R.M., McKenzie, A.N.J., Mebius, R.E., *et al.* (2018). Innate Lymphoid Cells: 10  
1367 Years On. *Cell* 174, 1054-1066.
- 1368 Walczak, A.P., Hendriksen, P.J., Woutersen, R.A., van der Zande, M., Undas, A.K., Helsdingen,  
1369 R., van den Berg, H.H., Rietjens, I.M., and Bouwmeester, H. (2015). Bioavailability and  
1370 biodistribution of differently charged polystyrene nanoparticles upon oral exposure in rats. *J*  
1371 *Nanopart Res* 17, 231.
- 1372 Wang, L., Wang, Y., Xu, M., Ma, J., Zhang, S., Liu, S., Wang, K., Tian, H., and Cui, J. (2021a).  
1373 Enhanced hepatic cytotoxicity of chemically transformed polystyrene microplastics by  
1374 simulated gastric fluid. *J Hazard Mater* 410, 124536.
- 1375 Wang, Y.L., Lee, Y.H., Hsu, Y.H., Chiu, I.J., Huang, C.C., Huang, C.C., Chia, Z.C., Lee, C.P.,  
1376 Lin, Y.F., and Chiu, H.W. (2021b). The Kidney-Related Effects of Polystyrene Microplastics  
1377 on Human Kidney Proximal Tubular Epithelial Cells HK-2 and Male C57BL/6 Mice. *Environ*  
1378 *Health Perspect* 129, 57003.
- 1379 Watson, A.R., Dai, H., Zheng, Y., Nakano, R., Giannou, A.D., Menk, A.V., Stolz, D.B.,  
1380 Delgoffe, G.M., and Thomson, A.W. (2019). mTORC2 Deficiency Alters the Metabolic  
1381 Profile of Conventional Dendritic Cells. *Front Immunol* 10, 1451.
- 1382 West, N.R., Hegazy, A.N., Owens, B.M.J., Bullers, S.J., Linggi, B., Buonocore, S., Coccia, M.,  
1383 Gortz, D., This, S., Stockenhuber, K., *et al.* (2017). Oncostatin M drives intestinal  
1384 inflammation and predicts response to tumor necrosis factor-neutralizing therapy in patients  
1385 with inflammatory bowel disease. *Nat Med* 23, 579-589.
- 1386 WHO (2019). Microplastics in drinking-water. Geneva: World Health Organization; Licence: CC  
1387 BY-NC-SA 3.0 IGO. <https://apps.who.int/iris/rest/bitstreams/1243269/retrieve>.
- 1388 Wilson, J.A., Prow, N.A., Schroder, W.A., Ellis, J.J., Cumming, H.E., Gearing, L.J., Poo, Y.S.,  
1389 Taylor, A., Hertzog, P.J., Di Giallonardo, F., *et al.* (2017). RNA-Seq analysis of chikungunya  
1390 virus infection and identification of granzyme A as a major promoter of arthritic  
1391 inflammation. *PLoS Pathog* 13, e1006155.
- 1392 Winkler, E.S., Shrihari, S., Hykes, B.L., Jr., Handley, S.A., Andhey, P.S., Huang, Y.S., Swain,  
1393 A., Droit, L., Chebrolu, K.K., Mack, M., *et al.* (2020). The Intestinal Microbiome Restricts  
1394 Alphavirus Infection and Dissemination through a Bile Acid-Type I IFN Signaling Axis. *Cell*  
1395 182, 901-918 e918.
- 1396 Wong, N.H., Chai, C.S., Bamgbade, J.A., Ma, G.F., and Hii, G.W. (2021). Detection of  
1397 Microplastics in Bottled Water. *Materials Science Forum* 1030, 169-176.
- 1398 Wu, D., Yu, D., Wang, X., and Yu, B. (2016). F-actin rearrangement is regulated by  
1399 mTORC2/Akt/Girdin in mouse fertilized eggs. *Cell Prolif* 49, 740-750.
- 1400 Wu, X., Pan, J., Li, M., Li, Y., Bartlam, M., and Wang, Y. (2019). Selective enrichment of  
1401 bacterial pathogens by microplastic biofilm. *Water Res* 165, 114979.
- 1402 Xie, J., Wang, X., and Proud, C.G. (2018). Who does TORC2 talk to? *Biochem J* 475, 1721-  
1403 1738.

- 1404 Xie, X., Deng, T., Duan, J., Xie, J., Yuan, J., and Chen, M. (2020). Exposure to polystyrene  
1405 microplastics causes reproductive toxicity through oxidative stress and activation of the p38  
1406 MAPK signaling pathway. *Ecotoxicol Environ Saf* *190*, 110133.
- 1407 Yang, Y.F., Chen, C.Y., Lu, T.H., and Liao, C.M. (2019). Toxicity-based  
1408 toxicokinetic/toxicodynamic assessment for bioaccumulation of polystyrene microplastics in  
1409 mice. *J Hazard Mater* *366*, 703-713.
- 1410 Yarosz, E.L., and Chang, C.H. (2018). The Role of Reactive Oxygen Species in Regulating T  
1411 Cell-mediated Immunity and Disease. *Immune Netw* *18*, e14.
- 1412 Yasuda, K., Takahashi, M., and Mori, N. (2015). Mdm20 Modulates Actin Remodeling through  
1413 the mTORC2 Pathway via Its Effect on Rictor Expression. *PLoS One* *10*, e0142943.
- 1414 Yong, C.Q.Y., Valiyaveetill, S., and Tang, B.L. (2020). Toxicity of Microplastics and  
1415 Nanoplastics in Mammalian Systems. *Int J Environ Res Public Health* *17*, 1509.
- 1416 Yu, Y., Mo, W.Y., and Luukkonen, T. (2021). Adsorption behaviour and interaction of organic  
1417 micropollutants with nano and microplastics - A review. *Sci Total Environ* *797*, 149140.
- 1418 Zakrzewski, M., Proietti, C., Ellis, J.J., Hasan, S., Brion, M.J., Berger, B., and Krause, L. (2017).  
1419 Calypso: a user-friendly web-server for mining and visualizing microbiome-environment  
1420 interactions. *Bioinformatics* *33*, 782-783.
- 1421 Zhang, D., Jin, W., Wu, R., Li, J., Park, S.A., Tu, E., Zanvit, P., Xu, J., Liu, O., Cain, A., *et al.*  
1422 (2019). High Glucose Intake Exacerbates Autoimmunity through Reactive-Oxygen-Species-  
1423 Mediated TGF-beta Cytokine Activation. *Immunity* *51*, 671-681 e675.
- 1424 Zhang, Q., Xu, E.G., Li, J., Chen, Q., Ma, L., Zeng, E.Y., and Shi, H. (2020). A Review of  
1425 Microplastics in Table Salt, Drinking Water, and Air: Direct Human Exposure. *Environ Sci*  
1426 *Technol* *54*, 3740-3751.
- 1427 Zheng, H., Wang, J., Wei, X., Chang, L., and Liu, S. (2021). Proinflammatory properties and  
1428 lipid disturbance of polystyrene microplastics in the livers of mice with acute colitis. *Sci Total*  
1429 *Environ* *750*, 143085.
- 1430 Zhu, Y.P., Zheng, Z., Hu, S., Ru, X., Fan, Z., Qiu, L., and Zhang, Y. (2019). Unification of  
1431 Opposites between Two Antioxidant Transcription Factors Nrf1 and Nrf2 in Mediating  
1432 Distinct Cellular Responses to the Endoplasmic Reticulum Stressor Tunicamycin.  
1433 *Antioxidants (Basel)* *9*, 4.
- 1434

Figure 1

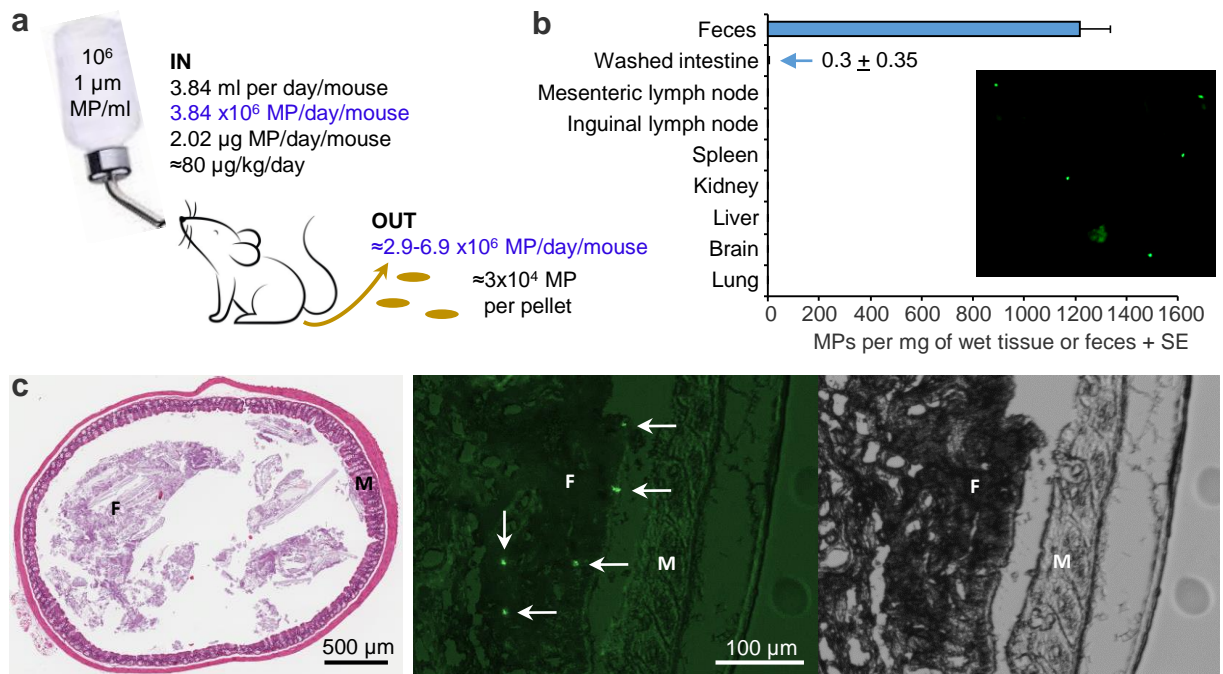

Figure 2

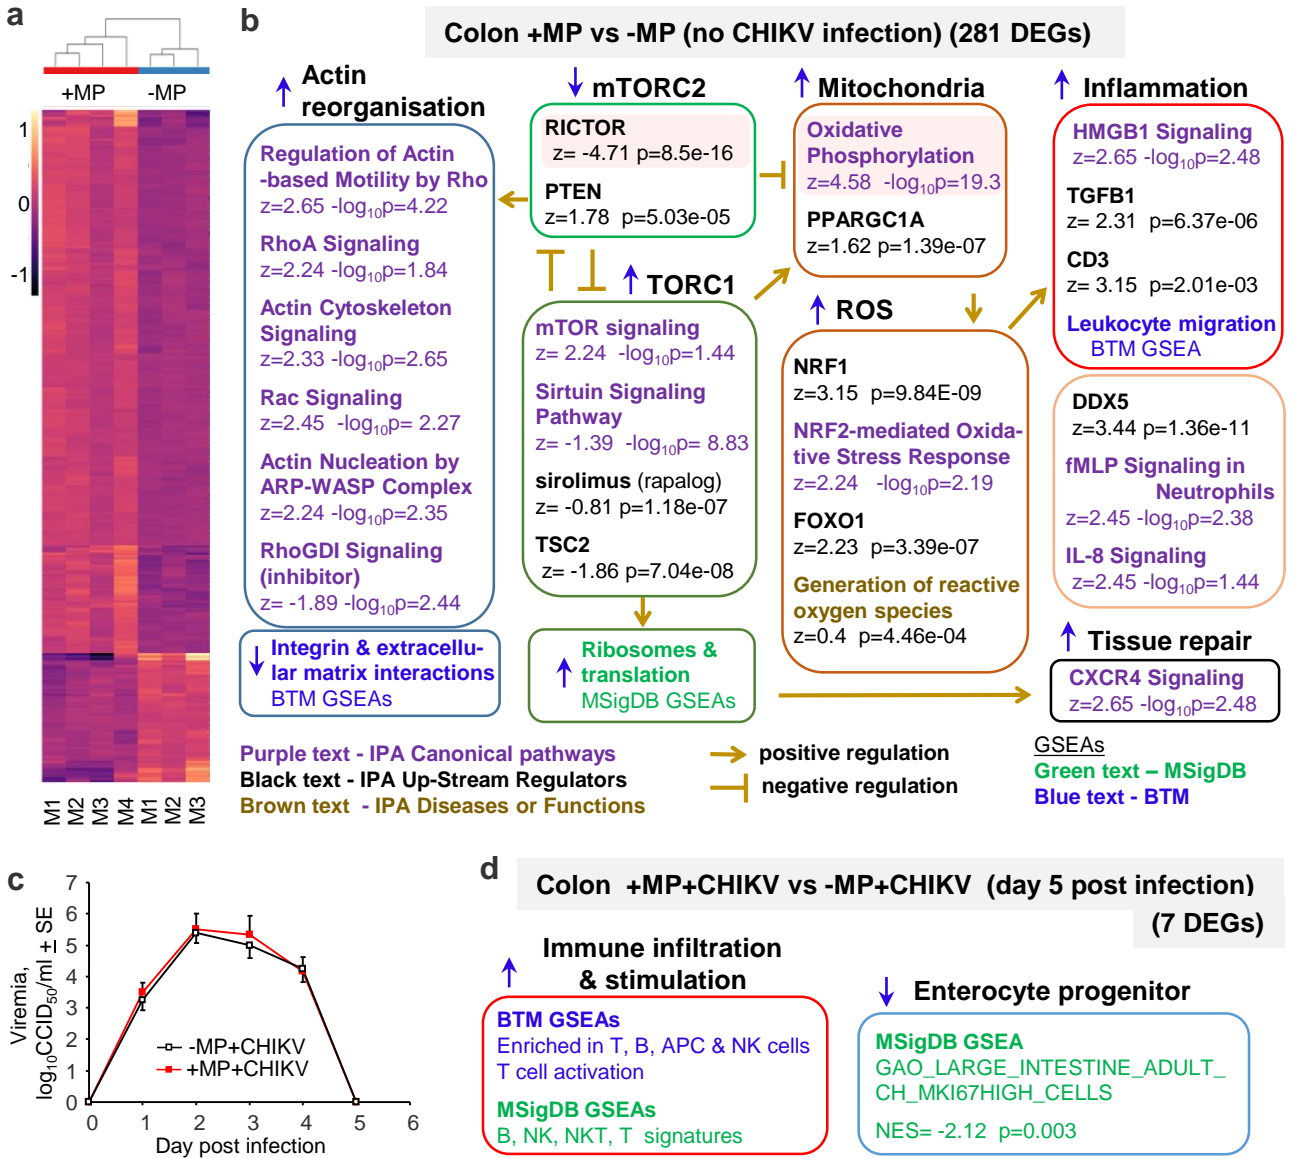

Figure 3

**a** MLN +MP vs -MP (no CHIKV infection) (1 DEG)

↑ Inflammation and leukocyte migration

**BTM GSEAs**

Wunder\_Inflammatory\_response\_and\_cholesterol\_UP  
NES= 2.29 q<0.001

HP\_Leukocytosis  
NES= 2.07 q=1.2x10<sup>-4</sup>

**MSigDB GSEA**

Leukocyte migration  
NES= +1.9 q<0.001

Black text - IPA Up-Stream Regulators

Brown text - IPA Diseases or Functions

GSEAs

Green text - MSigDB

Blue text - BTM

**b** MLN +MP+CHIKV vs -MP+CHIKV (day 9 post infection) (282 DEGs)

↑ Lymphocytes/leukocytes

**Quantity of T lymphocytes**  
z=2.56 p=8.44e-04

**Quantity of lymphocytes**  
z= 2.4 p=1.46e-03

**Quantity of mononuclear leukocytes**  
z= 2.01 p=1.24e-03

**BTM GSEAs**

T and NK cell signatures (p<0.05)

↓ T cell stimulation  
(and/or dilution)

**MYC**  
z= -5.98 p=6.57e-17

**TCR**  
z= -1.72 p=5.6e-06

**CD28**  
z= -1.39 p=7.03e-04

↓ Ribosome mRNAs

Of the 124 down DEGs,  
50 encoded ribosomal proteins

↑ Inflammation

**Up-DEGs** **OSM**  
z= 2.78 p=0.04

Figure 4

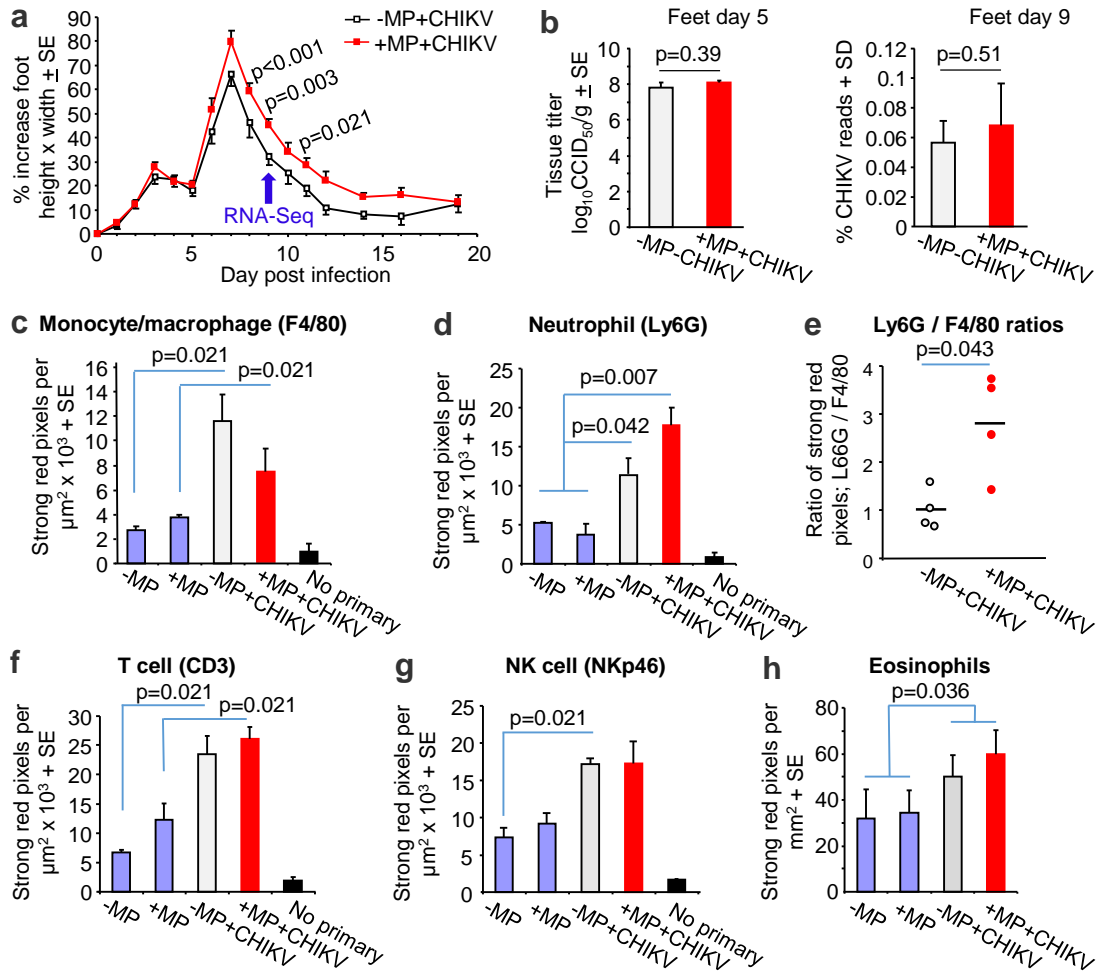

Figure 5

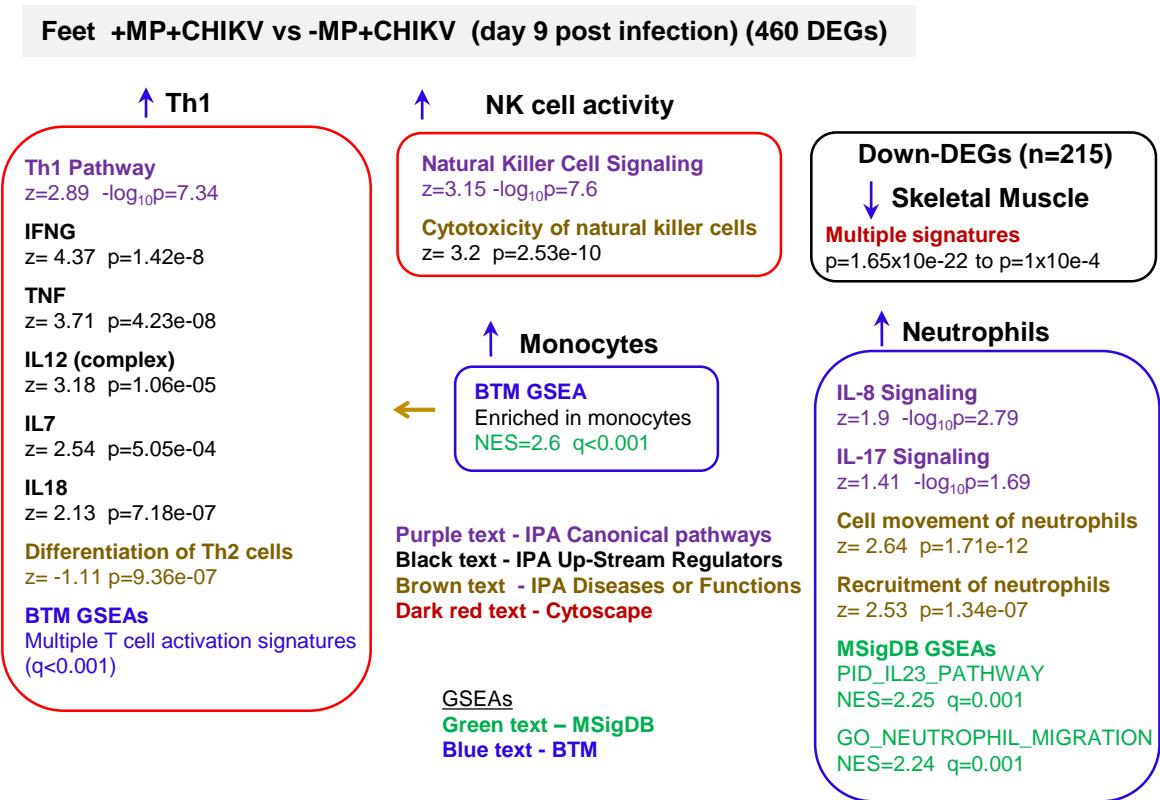

Figure 6

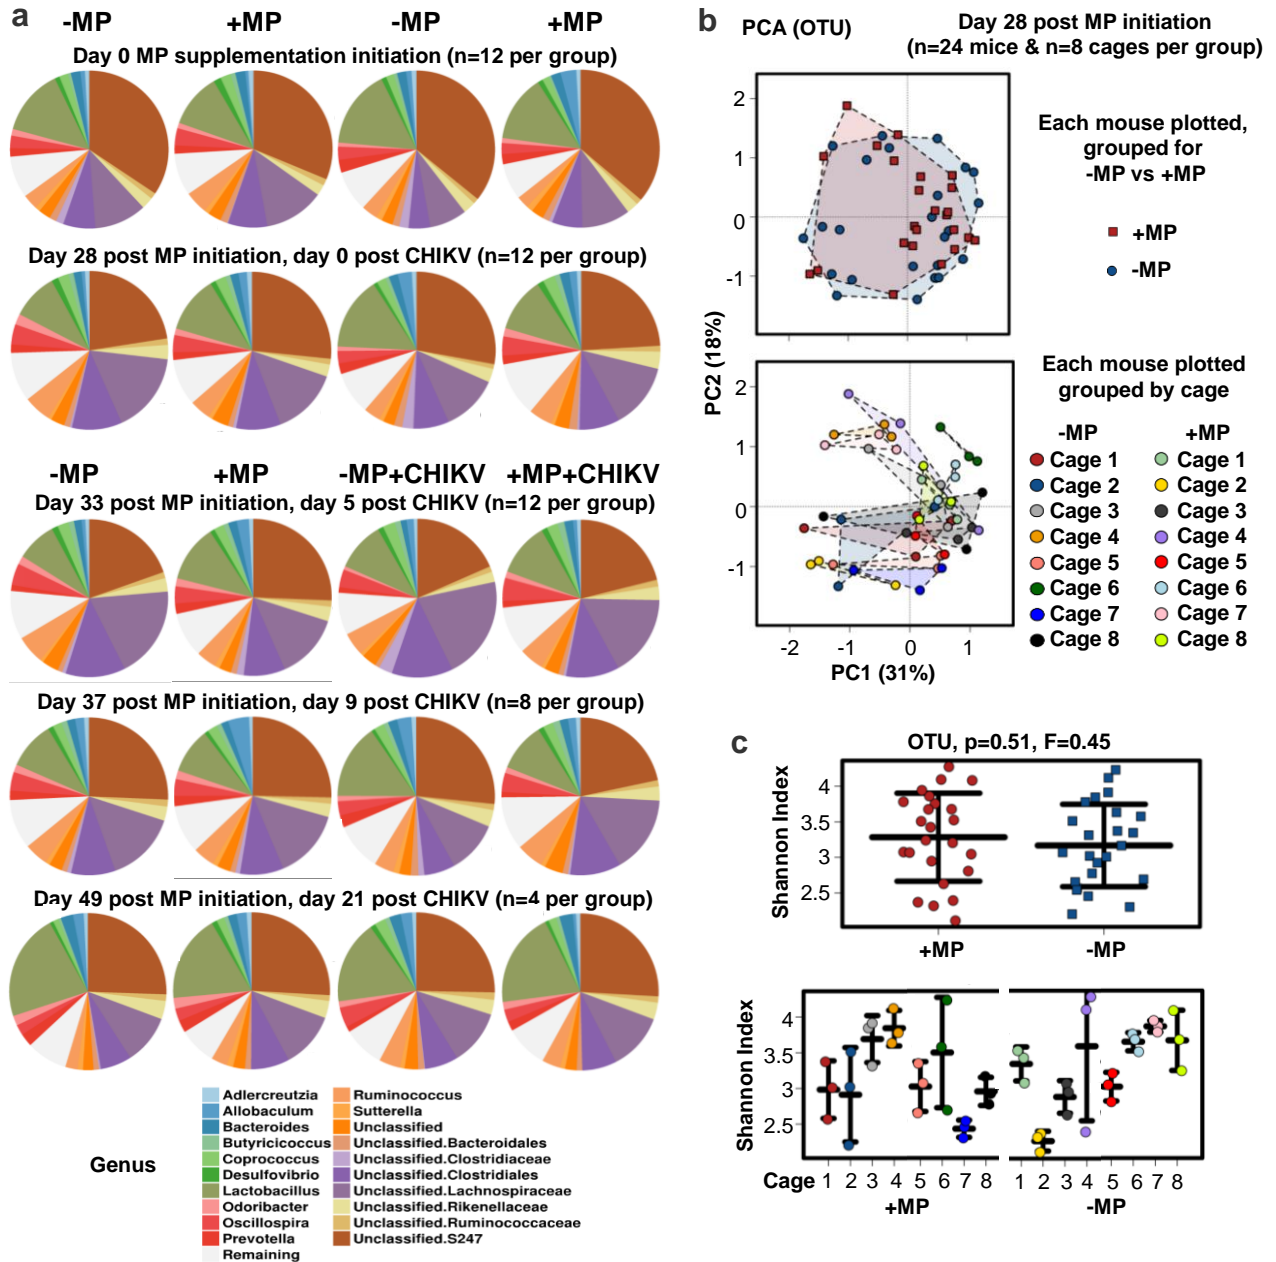



Figure 7

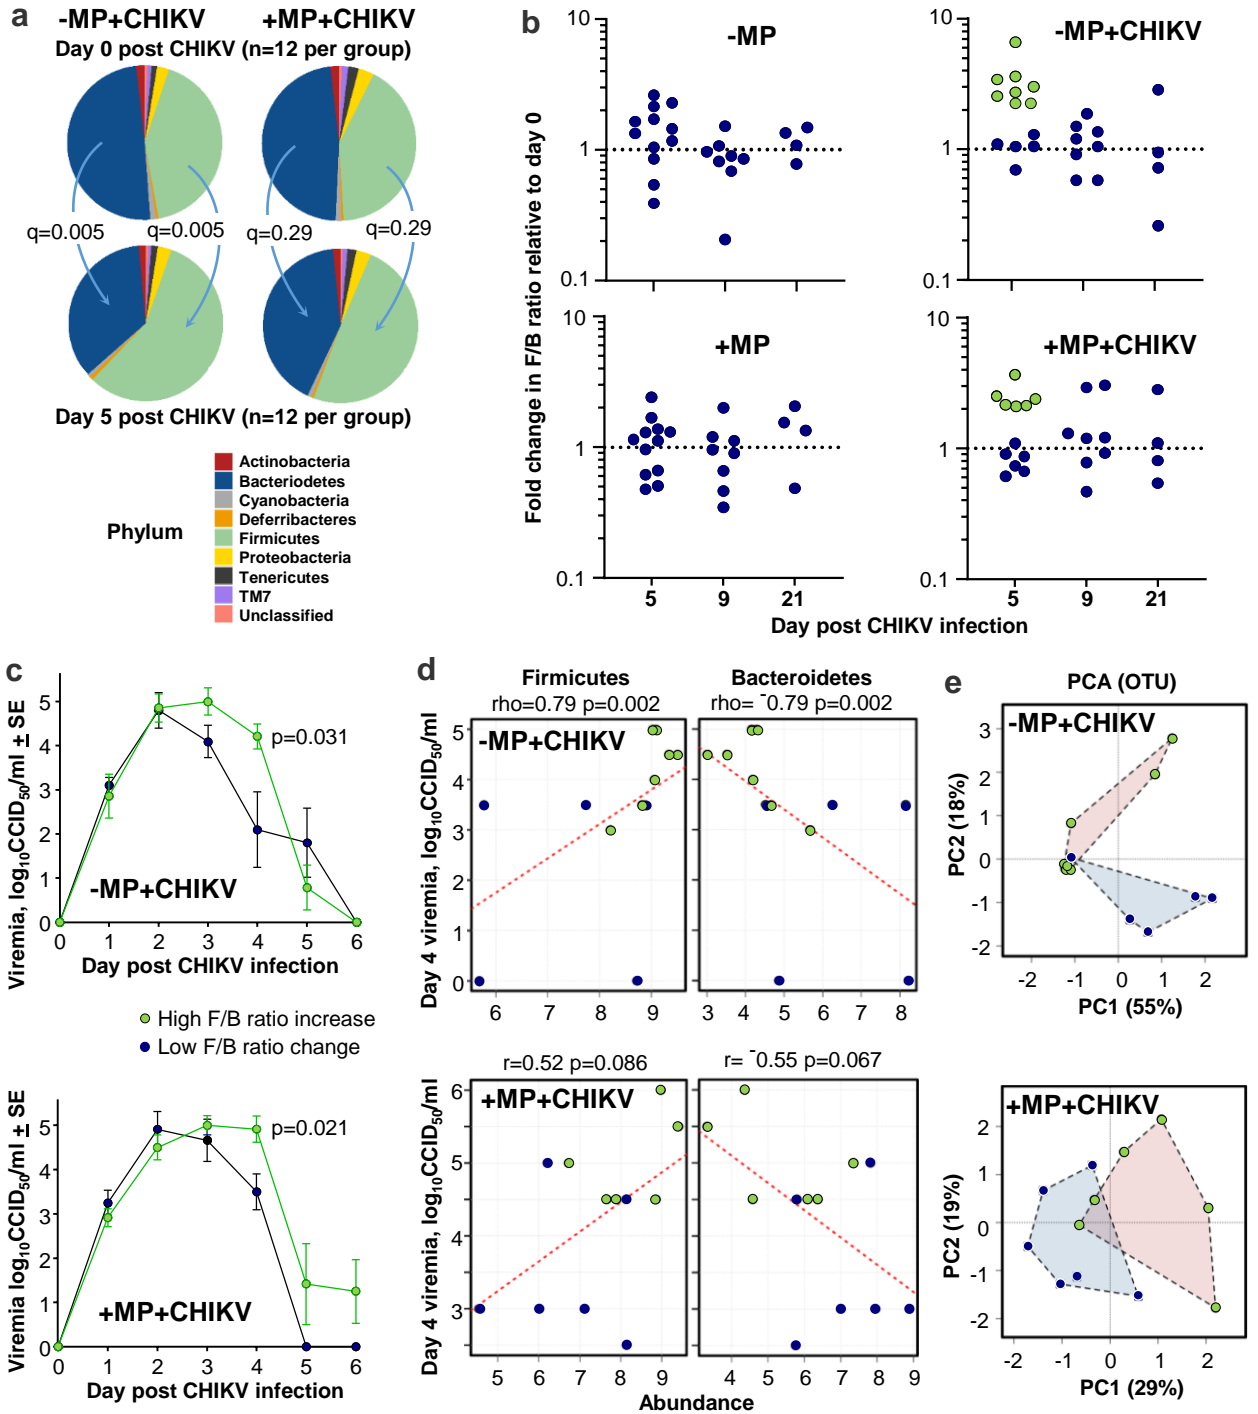

Source: http://biorxiv.org/content/10.1101/2021.08.24.456180v1.full.pdf
